# Supplementary material for: Direct synthesis of carbamates, thiocarbamates, and ureas from Boc-protected amines: a sustainable and efficient approach
Source: Royal Society of Chemistry journal article supplement (doi:10.1039/d4ra03683b), 2024-01-01

## Direct Synthesis of Carbamates, Thiocarbamates, and Ureas from Boc-Protected Amines: A Sustainable and Efficient Approach

Wanyong Li,<sup>+, [a]</sup> Mengting Lv,<sup>+, [a]</sup> Xiaolin Luo,<sup>[a]</sup> Zhouyu Wang,<sup>\*, [a, b]</sup> Qiao Song,<sup>\*, [a, b]</sup>

Xiaoqi Yu<sup>[a, b]</sup>

[a] Department of Chemistry, Xihua University, Chengdu 610039, China

[b] Asymmetric Synthesis and Chiral Technology Key Laboratory of Sichuan Province, Yibin 644000, China

[\*] Corresponding authors. E-mail address: zhouyuwang@mail.xhu.edu.cn, zhouyuwang77@163.com (Z.-Y. Wang); songqiao@mail.xhu.edu.cn (Q.

Song)

[+] These authors contributed equally.

### Supporting Information

#### Contents:

|                                                                                      |     |
|--------------------------------------------------------------------------------------|-----|
| 1. General Information .....                                                         | S2  |
| 2. Experimental procedure and characterization data.....                             | S2  |
| 2.1 General procedure for the synthesis of carbamates, thiocarbamates and ureas..... | S2  |
| 2.2 Characterization.....                                                            | S2  |
| 2.3 References .....                                                                 | S12 |
| 3. <sup>1</sup> H, <sup>13</sup> C NMR and HRMS spectra .....                        | S13 |

## 2.1 General information

All solvents were distilled from appropriate drying agents prior to use. Flash column chromatography was performed using silica gel (300-400 mesh). All reactions conducted at 110 °C were performed on a DF-101D collector thermostatic magnetic stirrer pan. <sup>1</sup>H NMR and <sup>13</sup>C NMR (400 and 101 MHz, respectively) spectra were recorded on a Bruker 400 MHz NMR spectrometer in CDCl<sub>3</sub> or DMSO-*d*<sub>6</sub>. <sup>1</sup>H NMR chemical shifts were reported in ppm (δ) relative to tetramethylsilane (TMS) with the solvent resonance employed as the internal standard (CDCl<sub>3</sub>, 7.26 ppm, DMSO-*d*<sub>6</sub>, 2.50 ppm). <sup>13</sup>C NMR chemical shifts were reported in ppm from TMS with the solvent resonance as the internal standard (CDCl<sub>3</sub>, 77.0 ppm, DMSO-*d*<sub>6</sub>, 39.5 ppm). HRMS data were recorded on a SCIEX X500R QTOF HRMS apparatus. Melting points were recorded on a MP430 automatic melting point apparatus.

## 2.2 General procedure for the synthesis of carbamates, thiocarbamates and ureas

Into a dry 10-mL round-bottom flask equipped with a magnetic stirring bar were added successively a N-Boc aniline (0.26 mmol, 1.0 equiv.), Lithium tert-butoxide (0.31 mmol, 1.2 equiv.), 1 mL of toluene and alcohol, mercaptan or amine substrate (1.3 mmol, 5.0 equiv.). Stir at 110 °C for 2h, the mixture was cooled to room temperature and then concentrated under reduced pressure. Purification by flash chromatography on silica gel to give the corresponding carbamates, thiocarbamates and ureas.

## 2.3 Characterization data

butyl phenylcarbamate (**8a**)

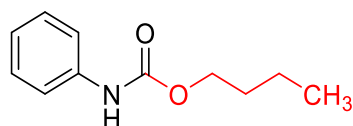

Prepared according to general procedure; 95% yield; White crystal; M.p. 60-62 °C; <sup>1</sup>H NMR (400 MHz, CDCl<sub>3</sub>): δ 7.41 (d, *J* = 8.0 Hz, 2H), 7.37 – 7.26 (m, 2H), 7.14 – 7.01 (m, 1H), 6.78 (d, *J* = 4.7 Hz, 1H), 4.20 (t, *J* = 6.7 Hz, 2H), 1.75 – 1.61 (m, 2H), 1.52 – 1.37 (m, 2H), 0.98 (t, *J* = 7.4 Hz, 3H). All analytical data were in good accordance with data reported in the literature<sup>[1]</sup>.

pentyl phenylcarbamate (**8b**)

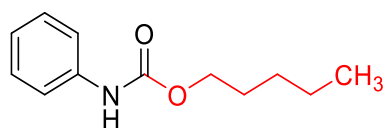

Prepared according to general procedure; 93% yield; White solid; M.p. 46-48 °C; <sup>1</sup>H NMR (400 MHz, CDCl<sub>3</sub>): δ 7.38 (d, *J* = 8.1 Hz, 2H), 7.30 (t, *J* = 7.8 Hz, 2H), 7.05 (t,

$J = 7.4$  Hz, 1H), 6.63 (s, 1H), 4.16 (t,  $J = 6.7$  Hz, 2H), 1.74 – 1.61 (m, 2H), 1.41 – 1.32 (m, 4H), 0.92 (t, 3H). All analytical data were in good accordance with data reported in the literature<sup>[2]</sup>.

ethyl phenylcarbamate (**8c**)

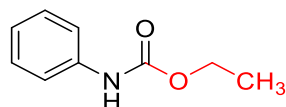

Prepared according to general procedure; 95% yield; White crystal; M.p. 49-50 °C; <sup>1</sup>H NMR (400 MHz, CDCl<sub>3</sub>):  $\delta$  7.29 (d,  $J = 8.0$  Hz, 2H), 7.24 – 7.17 (m, 2H), 7.00 – 6.94 (m, 1H), 6.50 (s, 1H), 4.14 (q,  $J = 7.1$  Hz, 2H), 1.23 (t,  $J = 7.1$  Hz, 3H). All analytical data were in good accordance with data reported in the literature<sup>[1]</sup>.

isobutyl phenylcarbamate (**8d**)

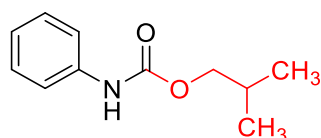

Prepared according to general procedure; 73% yield; White crystal; M.p. 84-86 °C; <sup>1</sup>H NMR (400 MHz, DMSO-*d*<sub>6</sub>):  $\delta$  9.59 (s, 1H), 7.56 – 7.42 (m, 2H), 7.40 – 7.21 (m, 2H), 7.01 – 6.94 (m, 1H), 3.87 (d,  $J = 6.7$  Hz, 2H), 2.00 – 1.83 (m, 1H), 0.94 (d,  $J = 6.7$  Hz, 6H). All analytical data were in good accordance with data reported in the literature<sup>[1]</sup>.

neopentyl phenylcarbamate (**8e**)

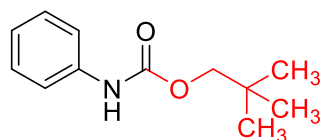

Prepared according to general procedure; 98% yield; White solid; M.p. 72-74 °C; <sup>1</sup>H NMR (400 MHz, DMSO-*d*<sub>6</sub>):  $\delta$  9.56 (s, 1H), 7.54 – 7.40 (m, 2H), 7.32 – 7.21 (m, 2H), 6.98 (m,  $J = 7.3, 1.2$  Hz, 1H), 3.79 (s, 2H), 0.95 (s, 9H). All analytical data were in good accordance with data reported in the literature<sup>[3]</sup>.

benzyl phenylcarbamate (**8f**)

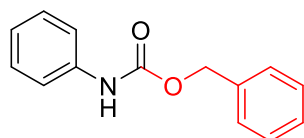

Prepared according to general procedure; 60% yield; White crystal; M.p. 70-72 °C; <sup>1</sup>H NMR (400 MHz, DMSO-*d*<sub>6</sub>):  $\delta$  9.75 (s, 1H), 7.48 (d,  $J = 7.8$  Hz, 2H), 7.45 – 7.31 (m, 5H), 7.28 (dd,  $J = 10.8, 5.1$  Hz, 2H), 6.99 (t,  $J = 7.4$  Hz, 1H),

5.15 (s, 2H). All analytical data were in good accordance with data reported in the literature<sup>[1]</sup>.

#### 4-methoxybenzyl phenylcarbamate (**8g**)

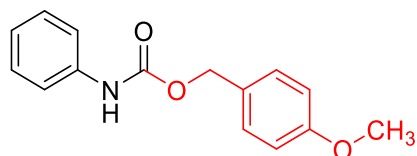

Prepared according to general procedure; 59% yield; White solid; M.p. 88-90 °C; <sup>1</sup>H NMR (400 MHz, CDCl<sub>3</sub>): δ 7.46 – 7.20 (m, 6H), 7.05 (d, *J* = 7.8 Hz, 1H), 6.93 – 6.85 (m, 2H), 6.73 (s, 1H), 5.12 (s, 2H), 3.80 (s, 3H). All analytical data were in good accordance with data reported in the literature<sup>[4]</sup>.

#### 4-(methylthio)benzyl phenylcarbamate (**8h**)

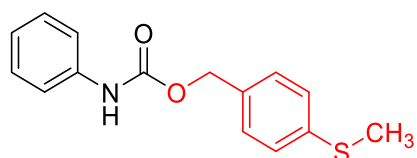

Prepared according to general procedure; 93% yield; White solid; M.p. 89-90 °C; <sup>1</sup>H NMR (400 MHz, CDCl<sub>3</sub>): δ 7.37 (d, *J* = 8.0 Hz, 2H), 7.30 (d, *J* = 6.7 Hz, 4H), 7.24 (dd, *J* = 8.2, 2.4 Hz, 2H), 7.06 (t, *J* = 7.6 Hz, 1H), 6.67 (s, 1H), 5.14 (s, 2H), 2.48 (s, 3H). <sup>13</sup>C NMR (101 MHz, CDCl<sub>3</sub>): δ 153.48, 139.17, 137.92, 132.99, 129.23 (d, *J* = 6.2 Hz), 126.84, 123.75, 118.93, 66.84, 15.94. HRMS (ESI): calcd for C<sub>15</sub>H<sub>15</sub>NO<sub>2</sub>S<sup>+</sup> (M + Na)<sup>+</sup>: 296.0721, found 296.0727.

#### 3-phenylpropyl phenylcarbamate (**8i**)

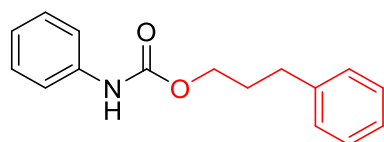

Prepared according to general procedure; 70% yield; White solid; M.p. 47-48 °C; <sup>1</sup>H NMR (400 MHz, DMSO-*d*<sub>6</sub>): δ 9.64 (s, 1H), 7.51 – 7.43 (m, 2H), 7.33 – 7.17 (m, 7H), 7.02 – 6.92 (m, 1H), 4.08 (t, *J* = 6.6 Hz, 2H), 2.69 (dd, *J* = 8.6, 6.9 Hz, 2H), 2.03 – 1.87 (m, 2H). All analytical data were in good accordance with data reported in the literature<sup>[5]</sup>.

#### 2-(thiophen-2-yl)ethyl phenylcarbamate (**8j**)

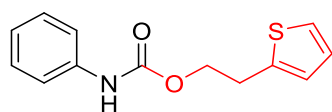

Prepared according to general procedure; 83% yield; White solid; M.p. 60-61 °C; <sup>1</sup>H NMR (400 MHz, CDCl<sub>3</sub>): δ 7.44 – 7.22 (m, 4H), 7.16 (d, *J* = 4.4 Hz, 1H),

7.07 (d,  $J = 8.2$  Hz, 1H), 6.95 (d,  $J = 4.4$  Hz, 1H), 6.88 (s, 1H), 6.69 (s, 1H), 4.39 (t,  $J = 7.8$  Hz, 2H), 3.20 (t,  $J = 7.6$  Hz, 2H).  $^{13}\text{C}$  NMR (101 MHz,  $\text{CDCl}_3$ ):  $\delta$  153.46, 140.14, 137.94, 129.24, 127.11, 125.72, 124.21, 123.72, 118.95, 65.54, 29.81. HRMS (ESI): calcd for  $\text{C}_{13}\text{H}_{13}\text{NO}_2\text{S}^+$  ( $\text{M} + \text{Na}$ ) $^+$ : 270.0565, found 270.0569.

#### cyclohexyl phenylcarbamate (**8k**)

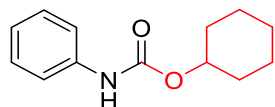

Prepared according to general procedure; 95% yield; White crystal; M.p. 79-80 °C;  $^1\text{H}$  NMR (400 MHz,  $\text{DMSO}-d_6$ ):  $\delta$  9.53 (s, 1H), 7.46 (d,  $J = 7.8$  Hz, 2H), 7.26 (dd,  $J = 10.7, 5.1$  Hz, 2H), 6.96 (t,  $J = 7.4$  Hz, 1H), 4.62 (td,  $J = 9.0, 4.0$  Hz, 1H), 1.95 – 1.82 (m, 2H), 1.71 (dd,  $J = 9.2, 4.1$  Hz, 2H), 1.59 – 1.47 (m, 1H), 1.46 – 1.28 (m, 4H), 1.28 – 1.15 (m, 1H). All analytical data were in good accordance with data reported in the literature<sup>[1]</sup>.

#### isopropyl phenylcarbamate (**8l**)

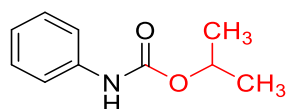

Prepared according to general procedure; 90% yield; White crystal; M.p. 83-85 °C;  $^1\text{H}$  NMR (400 MHz,  $\text{DMSO}-d_6$ ):  $\delta$  9.53 (s, 1H), 7.52 – 7.44 (m, 2H), 7.30 – 7.21 (m, 2H), 7.04 – 6.87 (m, 1H), 4.89 (p,  $J = 6.3$  Hz, 1H), 1.25 (d,  $J = 6.4$  Hz, 6H). All analytical data were in good accordance with data reported in the literature<sup>[1]</sup>.

#### heptan-2-yl phenylcarbamate (**8m**)

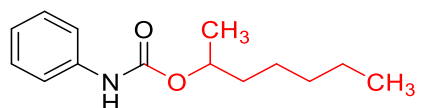

Prepared according to general procedure; 90% yield; Yellow oil;  $^1\text{H}$  NMR (400 MHz,  $\text{DMSO}-d_6$ ):  $\delta$  9.49 (s, 1H), 7.48 – 7.38 (m, 2H), 7.30 – 7.15 (m, 2H), 7.01 – 6.89 (m, 1H), 4.82 – 4.70 (m, 1H), 1.61 – 1.43 (m, 2H), 1.38 – 1.22 (m, 6H), 1.20 (d,  $J = 6.3$  Hz, 3H), 0.89 – 0.80 (m, 3H).  $^{13}\text{C}$  NMR (101 MHz,  $\text{DMSO}-d_6$ ):  $\delta$  153.30, 139.32, 128.63, 122.13, 118.05, 70.49, 35.57, 31.07, 24.53, 21.98, 20.16, 13.84. HRMS (ESI): calcd for  $\text{C}_{14}\text{H}_{21}\text{NO}_2^+$  ( $\text{M} + \text{Na}$ ) $^+$ : 258.1470, found 258.1474.

#### 1-phenylethyl phenylcarbamate (**8n**)

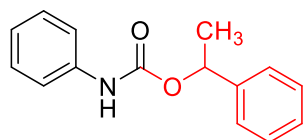

Prepared according to general procedure; 50% yield; White crystal; M.p. 90-92 °C;  $^1\text{H NMR}$  (400 MHz,  $\text{CDCl}_3$ ):  $\delta$  7.37 (d,  $J = 10.0$  Hz, 6H), 7.33 – 7.24 (m, 3H), 7.05 (d,  $J = 7.6$  Hz, 1H), 6.66 (s, 1H), 5.90 (q,  $J = 7.2$  Hz, 1H), 1.60 (d,  $J = 4.2$  Hz, 3H). All analytical data were in good accordance with data reported in the literature<sup>[1]</sup>.

#### 2-ethoxyethyl phenylcarbamate (8o)

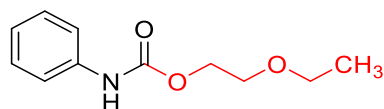

Prepared according to general procedure; 80% yield; Yellow oil;  $^1\text{H NMR}$  (400 MHz,  $\text{DMSO}-d_6$ ):  $\delta$  9.73 (s, 1H), 7.52 – 7.41 (m, 2H), 7.35 – 7.19 (m, 2H), 7.08 – 6.93 (m, 1H), 4.30 – 4.10 (m, 2H), 3.65 – 3.53 (m, 2H), 3.47 (q,  $J = 7.0$  Hz, 2H), 1.12 (t,  $J = 7.0$  Hz, 3H).  $^{13}\text{C NMR}$  (101 MHz,  $\text{DMSO}-d_6$ ):  $\delta$  153.95, 139.63, 129.17, 122.79, 118.60, 68.54, 65.99, 64.01, 15.51. **HRMS (ESI)**: calcd for  $\text{C}_{11}\text{H}_{15}\text{NO}_3^+$  ( $\text{M} + \text{Na}$ ) $^+$ : 270.0950, found 232.0954.

#### 2-bromoethyl phenylcarbamate (8p)

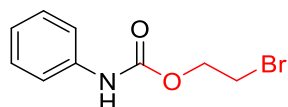

Prepared according to general procedure; 70% yield; Pale yellow oil; M.p. 73-75 °C;  $^1\text{H NMR}$  (400 MHz,  $\text{CDCl}_3$ ):  $\delta$  7.12 (t,  $J = 7.9$  Hz, 2H), 6.67 (t,  $J = 7.3$  Hz, 1H), 6.60 (d,  $J = 8.0$  Hz, 2H), 3.77 (t,  $J = 5.2$  Hz, 2H), 3.24 (t,  $J = 5.2$  Hz, 2H).  $^{13}\text{C NMR}$  (101 MHz,  $\text{CDCl}_3$ ):  $\delta$  147.91, 129.51, 118.44, 113.71, 61.27, 46.55, 29.85. **HRMS (ESI)**: calcd for  $\text{C}_9\text{H}_{10}\text{NO}_2\text{Br}^+$  ( $\text{M} + \text{Na}$ ) $^+$ : 265.9793, found 265.9791.

#### tert-butyl 4-(2-((phenylcarbamoyl)oxy)ethyl)piperidine-1-carboxylate (8q)

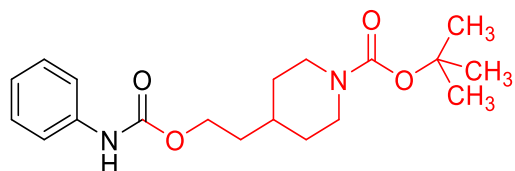

Prepared according to general procedure; 80% yield; Pale yellow oil;  $^1\text{H NMR}$  (400 MHz,  $\text{CDCl}_3$ ):  $\delta$  7.31 (d,  $J = 8.0$  Hz, 2H), 7.26 – 7.18 (m, 2H), 7.05 – 6.95 (m, 1H), 6.62 (s, 1H), 4.15 (t,  $J = 6.5$  Hz, 2H), 4.10 – 3.95 (m, 2H), 2.62 (t,  $J = 12.9$  Hz, 2H), 1.62 (d,  $J = 12.9$  Hz, 2H), 1.55 (t,  $J = 6.4$  Hz, 2H), 1.38 (s, 9H), 1.23 – 1.16 (m, 1H), 1.13 – 1.01 (m, 2H).  $^{13}\text{C NMR}$  (101 MHz,  $\text{CDCl}_3$ ):  $\delta$  154.96, 138.17 (d,  $J = 2.2$  Hz),

129.07, 123.41, 118.83, 79.43, 62.89, 39.34, 35.56, 32.99, 32.06, 28.54, 14.25. **HRMS (ESI):** calcd for  $C_{19}H_{28}N_2O_4^+$  ( $M + Na$ ) $^+$ : 371.1947, found 371.1952.

3-methylbut-2-en-1-yl phenylcarbamate (**8r**)

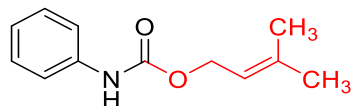

Prepared according to general procedure; 80% yield; White solid; M.p. 63-65 °C  **$^1H$  NMR (400 MHz,  $CDCl_3$ ):**  $\delta$  7.33 – 7.25 (m, 2H), 7.24 – 7.17 (m, 2H), 6.97 (tt,  $J = 7.2, 1.3$  Hz, 1H), 6.51 (s, 1H), 5.32 (tdt,  $J = 7.3, 2.9, 1.4$  Hz, 1H), 4.58 (d,  $J = 7.3$  Hz, 2H), 1.70 (d,  $J = 1.4$  Hz, 3H), 1.67 (d,  $J = 1.4$  Hz, 3H). All analytical data were in good accordance with data reported in the literature<sup>[6]</sup>.

bicyclo[2.2.1]hept-5-en-2-ylmethyl phenylcarbamate (**8s**)

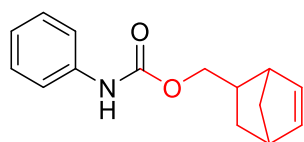

Prepared according to general procedure; 95% yield; White solid; M.p. 123-125 °C;  **$^1H$  NMR (400 MHz,  $CDCl_3$ ):**  $\delta$  7.42 – 7.25 (m, 4H), 7.05 (t,  $J = 7.4$  Hz, 1H), 6.65 (d,  $J = 12.3$  Hz, 1H), 6.23 – 5.94 (m, 2H), 4.33 – 3.70 (m, 2H), 2.96 – 2.68 (m, 2H), 2.52 – 2.33 (m, 1H), 1.93 – 1.72 (m, 1H), 1.52 – 0.51 (m, 4H).  **$^{13}C$  NMR (101 MHz,  $CDCl_3$ ):**  $\delta$  153.84, 137.82, 136.38, 132.36, 129.23, 123.54 (d,  $J = 5.5$  Hz), 118.84, 68.88, 49.59, 44.08, 42.40, 38.26, 29.11. **HRMS (ESI):** calcd for  $C_{15}H_{17}NO_2^+$  ( $M + Na$ ) $^+$ : 266.1157, found 266.1161.

allyl phenylcarbamate (**8t**)

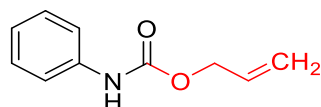

Prepared according to general procedure; 20% yield; White crystal; M.p. 67-68 °C;  **$^1H$  NMR (400 MHz,  $DMSO-d_6$ ):**  $\delta$  9.70 (s, 1H), 7.49 – 7.42 (m, 2H), 7.35 – 7.20 (m, 2H), 7.05 – 6.94 (m, 1H), 6.07 – 5.89 (m, 1H), 5.47 – 5.10 (m, 2H), 4.64 – 4.56 (m, 2H). All analytical data were in good accordance with data reported in the literature<sup>[1]</sup>.

4-(methylthio)benzyl (4-fluorophenyl)carbamate (**8u**)

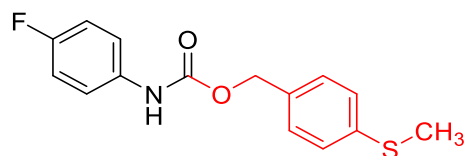

Prepared according to general procedure; 80% yield; White solid; M.p. 113-114 °C; **<sup>1</sup>H NMR (400 MHz, CDCl<sub>3</sub>)**: δ 7.31 (d, *J* = 7.9 Hz, 4H), 7.28 – 7.22 (m, 2H), 6.99 (t, *J* = 8.4 Hz, 2H), 6.63 (s, 1H), 5.14 (s, 2H), 2.48 (s, 3H). **<sup>13</sup>C NMR (101 MHz, CDCl<sub>3</sub>)**: δ 160.48, 153.66, 139.25, 133.89, 132.87, 129.21, 126.80, 120.73, 115.88 (d, *J* = 22.6 Hz), 66.94, 15.90. **HRMS (ESI)**: calcd for C<sub>15</sub>H<sub>14</sub>NO<sub>2</sub>SF<sup>+</sup> (M + Na)<sup>+</sup>: 314.0627, found 314.0630.

#### 4-(methylthio)benzyl (4-chlorophenyl)carbamate (**8v**)

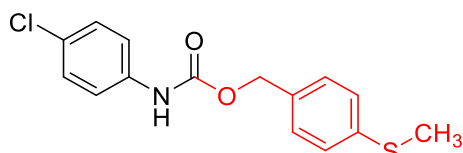

Prepared according to general procedure; 80% yield; White solid; M.p. 133-134 °C; **<sup>1</sup>H NMR (400 MHz, CDCl<sub>3</sub>)**: δ 7.38 – 7.28 (m, 4H), 7.28 – 7.22 (m, 4H), 6.68 (s, 1H), 5.14 (s, 2H), 2.48 (s, 3H). **<sup>13</sup>C NMR (101 MHz, CDCl<sub>3</sub>)**: δ 153.35, 139.31, 136.52, 132.69, 129.24, 128.74, 126.74, 120.08, 67.02, 15.86. **HRMS (ESI)**: calcd for C<sub>15</sub>H<sub>14</sub>NO<sub>2</sub>SCI<sup>+</sup> (M + Na)<sup>+</sup>: 330.0331, found 330.0334.

#### 4-(methylthio)benzyl (4-bromophenyl)carbamate (**8w**)

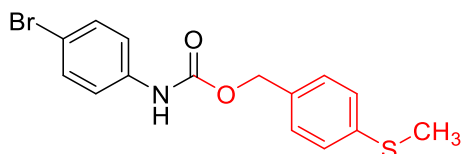

Prepared according to general procedure; 90% yield; Yellow solid; M.p. 133-135 °C; **<sup>1</sup>H NMR (400 MHz, CDCl<sub>3</sub>)**: δ 7.43 – 7.37 (m, 2H), 7.34 – 7.22 (m, 6H), 6.71 (s, 1H), 5.14 (s, 2H), 2.48 (s, 3H). **<sup>13</sup>C NMR (101 MHz, CDCl<sub>3</sub>)**: δ 153.14, 139.17, 136.89, 132.49, 132.03, 129.09, 126.56, 120.25, 116.08, 66.88, 15.70. **HRMS (ESI)**: calcd for C<sub>15</sub>H<sub>14</sub>NO<sub>2</sub>SBr<sup>+</sup> (M + Na)<sup>+</sup>: 373.9826, found 373.9828.

#### 4-(methylthio)benzyl (3-aminophenyl)carbamate (**8x**)

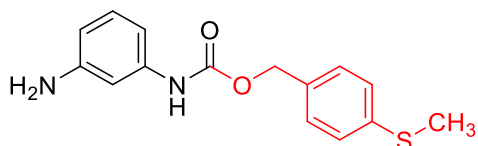

Prepared according to general procedure; 93% yield; Yellow solid; M.p. 68-70 °C; **<sup>1</sup>H NMR (400 MHz, CDCl<sub>3</sub>)**: δ 7.32 (d, *J* = 8.0 Hz, 2H), 7.25 (d, *J* = 7.9 Hz, 3H), 7.05 (t, *J* = 8.0 Hz, 1H), 6.94 (s, 1H), 6.62 – 6.54 (m, 2H), 6.45 – 6.33 (m, 1H), 5.13 (s, 2H), 3.68 (s, 2H), 2.48 (s, 3H). **<sup>13</sup>C NMR (101 MHz, CDCl<sub>3</sub>)**: δ 153.38, 147.50, 139.09, 138.95, 133.05, 129.98, 129.15, 126.82, 110.53, 108.96, 105.45, 66.73, 15.93. **HRMS (ESI)**: calcd for C<sub>15</sub>H<sub>16</sub>N<sub>2</sub>O<sub>2</sub>S<sup>+</sup> (M + Na)<sup>+</sup>: 311.0830, found 311.0834.



---

#### 4-(methylthio)benzyl cyclohexylcarbamate (**8y**)

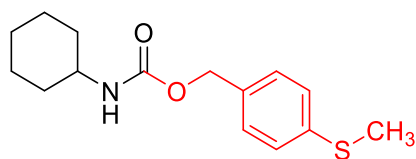

Prepared according to general procedure; 50% yield; White solid; M.p. 93-95 °C; **<sup>1</sup>H NMR (400 MHz, CDCl<sub>3</sub>):** δ 7.32 – 7.20 (m, 4H), 5.03 (s, 2H), 4.61 (s, 1H), 3.49 (d, *J* = 10.5 Hz, 1H), 2.48 (s, 3H), 2.01 – 1.86 (m, 2H), 1.77 – 1.64 (m, 2H), 1.63 – 1.54 (m, 2H), 1.42 – 1.26 (m, 2H), 1.16 – 1.09 (m, 2H). **<sup>13</sup>C NMR (101 MHz, CDCl<sub>3</sub>)** δ 155.70, 138.67, 133.74, 129.00, 126.85, 66.26, 50.08, 33.57, 25.65, 24.93, 16.01. **HRMS (ESI):** calcd for C<sub>15</sub>H<sub>21</sub>NO<sub>2</sub>S<sup>+</sup> (M + Na)<sup>+</sup>:302.1191, found 302.1196.

#### S-phenethyl phenylcarbamothioate (**8z**)

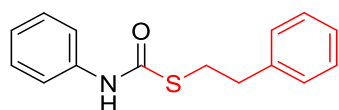

Prepared according to general procedure; 80% yield; White solid; M.p. 108-110 °C; **<sup>1</sup>H NMR (400 MHz, CDCl<sub>3</sub>):** δ 7.46 – 7.39 (m, 2H), 7.38 – 7.28 (m, 4H), 7.26 – 7.20 (m, 3H), 7.13 (ddt, *J* = 8.6, 7.3, 1.2 Hz, 1H), 7.01 (s, 1H), 3.29 – 3.18 (m, 2H), 2.99 (dd, *J* = 8.8, 6.5 Hz, 2H). All analytical data were in good accordance with data reported in the literature<sup>[7]</sup>.

#### S-isobutyl phenylcarbamothioate (**8aa**)

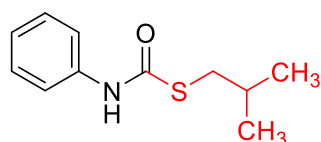

Prepared according to general procedure; 90% yield; White solid; M.p. 105-107 °C; **<sup>1</sup>H NMR (400 MHz, CDCl<sub>3</sub>):** δ 7.42 – 7.37 (m, 2H), 7.32 – 7.23 (m, 2H), 7.14 – 7.00 (m, 2H), 2.88 (d, *J* = 6.7 Hz, 2H), 1.86 (dq, *J* = 13.3, 6.7 Hz, 1H), 0.98 (d, *J* = 6.7 Hz, 6H). **<sup>13</sup>C NMR (101 MHz, CDCl<sub>3</sub>)** δ 166.19, 137.98, 129.24, 124.44, 119.80, 38.82, 29.31, 28.47, 21.80. **HRMS (ESI):** calcd for C<sub>11</sub>H<sub>15</sub>NOS<sup>+</sup> (M + Na)<sup>+</sup>: 232.0772, found 232.0775.

#### S-cyclohexyl phenylcarbamothioate (**8ab**)

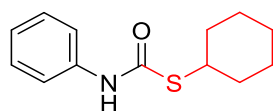

Prepared according to general procedure; 70% yield; Yellow solid; M.p. 106-107 °C; **<sup>1</sup>H NMR (400 MHz, CDCl<sub>3</sub>):** δ 7.43 – 7.38 (m, 2H), 7.33 – 7.27 (m, 2H), 7.10 (d, *J* = 7.4 Hz, 1H), 7.08 – 7.04 (m, 1H), 3.60 – 3.50 (m, 1H), 2.09 –

1.96 (m, 2H), 1.73 (dq,  $J = 12.1, 3.9$  Hz, 2H), 1.45 (dddd,  $J = 21.9, 16.0, 9.5, 4.5$  Hz, 5H), 1.34 – 1.19 (m, 1H). All analytical data were in good accordance with data reported in the literature<sup>[8]</sup>.

#### S-(4-chlorobenzyl) phenylcarbamothioate (**8ac**)

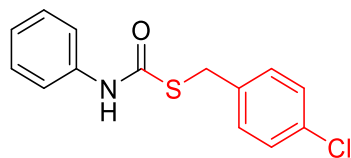

Prepared according to general procedure; 90% yield; Yellow solid; M.p. 119-121 °C; <sup>1</sup>H NMR (400 MHz, CDCl<sub>3</sub>): δ 7.40 (d,  $J = 8.1$  Hz, 2H), 7.31 (dd,  $J = 17.6, 7.1$  Hz, 6H), 7.12 (t,  $J = 7.4$  Hz, 1H), 7.03 (s, 1H), 4.17 (s, 2H). All analytical data were in good accordance with data reported in the literature<sup>[8]</sup>.

#### S-benzyl phenylcarbamothioate (**8ad**)

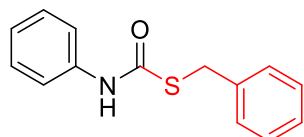

Prepared according to general procedure; 70% yield; Yellow solid; M.p. 93-95 °C; <sup>1</sup>H NMR (400 MHz, CDCl<sub>3</sub>): δ 7.45 – 7.28 (m, 9H), 7.27 – 7.20 (m, 1H), 7.11 (t,  $J = 7.3$  Hz, 1H), 7.05 (s, 1H), 4.23 (s, 2H). All analytical data were in good accordance with data reported in the literature<sup>[8]</sup>.

#### S-butyl phenylcarbamothioate (**8ae**)

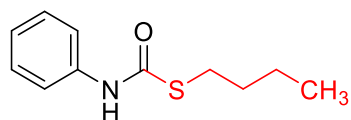

Prepared according to general procedure; 90% yield; White solid; M.p. 73-74 °C; <sup>1</sup>H NMR (400 MHz, CDCl<sub>3</sub>): δ 7.44 – 7.37 (m, 2H), 7.35 – 7.27 (m, 2H), 7.10 (tt,  $J = 7.2, 1.2$  Hz, 2H), 2.98 (t,  $J = 7.3$  Hz, 2H), 1.65 (tt,  $J = 8.8, 6.7$  Hz, 2H), 1.43 (dq,  $J = 14.5, 7.3$  Hz, 2H), 0.93 (t,  $J = 7.4$  Hz, 3H). All analytical data were in good accordance with data reported in the literature<sup>[8]</sup>.

#### 1-phenyl-3-(m-tolyl)urea (**8af**)

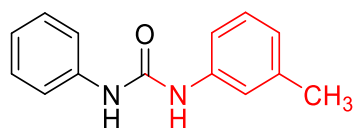

Prepared according to general procedure; 87% yield; White solid; M.p. 230-235 °C; <sup>1</sup>H NMR (400 MHz, DMSO-*d*<sub>6</sub>): δ 8.65 (s, 1H), 8.56 (d,  $J = 6.8$  Hz,

1H), 7.49 – 7.42 (m, 3H), 7.33 – 7.29 (m, 2H), 7.19 – 7.10 (m, 1H), 7.00 – 6.92 (m, 2H), 6.79 (d,  $J = 7.4$  Hz, 1H), 2.28 (s, 3H). All analytical data were in good accordance with data reported in the literature<sup>[9]</sup>.

#### 1-(2-bromophenyl)-3-phenylurea (**8ag**)

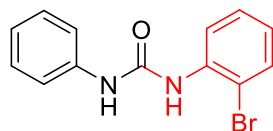

Prepared according to general procedure; 70% yield; White solid; M.p. 171-173 °C; <sup>1</sup>H NMR (400 MHz, DMSO-*d*<sub>6</sub>): δ 9.46 (s, 1H), 8.14 (s, 1H), 8.09 – 8.03 (m, 1H), 7.63 – 7.59 (m, 1H), 7.47 (d,  $J = 7.9$  Hz, 2H), 7.32 (dt,  $J = 15.7, 7.7$  Hz, 3H), 6.97 (dt,  $J = 8.7, 4.2$  Hz, 2H). All analytical data were in good accordance with data reported in the literature<sup>[10]</sup>.

#### 1-(3-bromophenyl)-3-phenylurea (**8ah**)

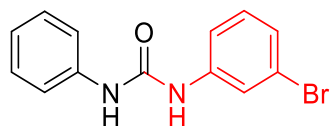

Prepared according to general procedure; 81% yield; White crystal; M.p. 171-173 °C; <sup>1</sup>H NMR (400 MHz, DMSO-*d*<sub>6</sub>): δ 8.98 – 8.70 (m, 1H), 8.64 (s, 1H), 7.48 – 7.43 (m, 3H), 7.34 – 7.21 (m, 4H), 6.98 (qt,  $J = 7.4, 1.3$  Hz, 2H). All analytical data were in good accordance with data reported in the literature<sup>[10]</sup>.

#### 1-(naphthalen-1-yl)-3-phenylurea (**8ai**)

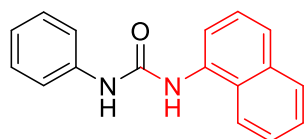

Prepared according to general procedure; 95% yield; Pale purple solid; M.p. 242-246 °C; <sup>1</sup>H NMR (400 MHz, DMSO-*d*<sub>6</sub>): δ 8.84 (d,  $J = 115.3$  Hz, 1H), 8.58 (s, 1H), 8.12 – 7.81 (m, 2H), 7.60 – 7.49 (m, 1H), 7.49 – 7.40 (m, 2H), 7.42 – 7.33 (m, 2H), 7.29 – 7.15 (m, 3H), 6.98 – 6.86 (m, 1H). All analytical data were in good accordance with data reported in the literature<sup>[11]</sup>.

#### 1-(2-aminophenyl)-3-phenylurea (**8aj**)

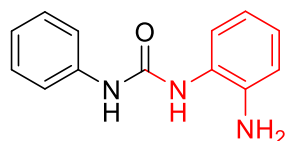

---

Prepared according to general procedure; 80% yield; White solid; M.p. 183–184 °C;  $^1\text{H NMR}$  (400 MHz,  $\text{DMSO-}d_6$ ):  $\delta$  8.68 (s, 2H), 7.45 (dd,  $J = 8.5, 1.0$  Hz, 4H), 7.34 – 7.20 (m, 4H), 7.01 – 6.83 (m, 2H). All analytical data were in good accordance with data reported in the literature<sup>[12]</sup>.

### 1-benzyl-3-phenylurea (8ak)

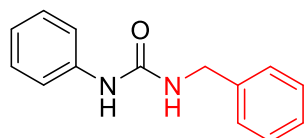

Prepared according to general procedure; 81% yield; White solid; M.p. 171–172 °C;  $^1\text{H NMR}$  (400 MHz,  $\text{DMSO-}d_6$ ):  $\delta$  8.54 (s, 1H), 7.44 – 7.37 (m, 2H), 7.36 – 7.27 (m, 4H), 7.27 – 7.19 (m, 3H), 6.94 – 6.85 (m, 1H), 6.60 (t,  $J = 6.0$  Hz, 1H), 4.31 (d,  $J = 5.9$  Hz, 2H). All analytical data were in good accordance with data reported in the literature<sup>[12]</sup>.

## 2.3 References

- [1] I. Dindarloo Inaloo, S. Majnooni, *New J. Chem.* **2018**, *42*, 13249–13255.
- [2] X. Zhang, H. Jing, G. Zhang, *Synthetic Communications* **2010**, *40*, 1614–1624.
- [3] C. Hu, T.-R. Su, T.-J. Lin, C.-W. Chang, K.-L. Tung, *New J. Chem.* **2018**, *42*, 3999–4007.
- [4] X. Zhu, Y. Qi, Y. Yang, D. Guo, Z. Huang, L. Zhang, Y. Wei, S. Zhou, S. Wang, *Inorg. Chem.* **2022**, *61*, 3202–3211.
- [5] R. N. Salvatore, F. Chu, A. S. Nagle, E. A. Kapxhiu, R. M. Cross, K. W. Jung, **2002**.
- [6] X. Yi, X. Hu, *Angew Chem Int Ed* **2019**, *58*, 4700–4704.
- [7] K. H. Lee, M. Koketsu, S. Y. Choi, K. J. Lee, P. Lee, H. Ishihara, S. Y. Kim, **2005**.
- [8] C. Lu, L. Hu, B. Zhao, Y. Yao, **n.d.**
- [9] R. Ahmed, R. Gupta, Z. Akhter, M. Kumar, P. P. Singh, *Org. Biomol. Chem.* **2022**, *20*, 4942–4948.
- [10] M. S. Yadav, S. K. Singh, A. K. Agrahari, A. S. Singh, V. K. Tiwari, *Synthesis* **2021**, *53*, 2494–2502.
- [11] L. Wang, H. Wang, G. Li, S. Min, F. Xiang, S. Liu, W. Zheng, *Adv Synth Catal* **2018**, *360*, 4585–4593.
- [12] J. E. Jakobsson, S. Telu, S. Lu, S. Jana, V. W. Pike, *Chemistry A European J* **2021**, *27*, 10369–10376.

## 1. $^1\text{H}$ , $^{13}\text{C}$ NMR and HRMS spectra

### $^1\text{H}$ NMR spectra of **8a**

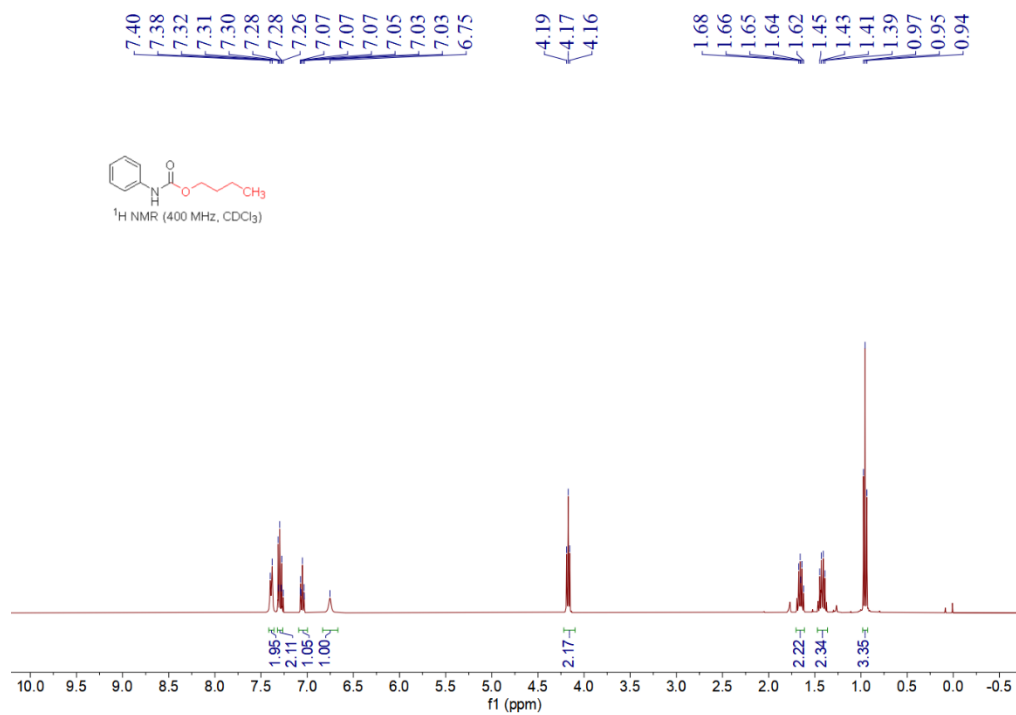

### $^1\text{H}$ NMR spectra of **8b**

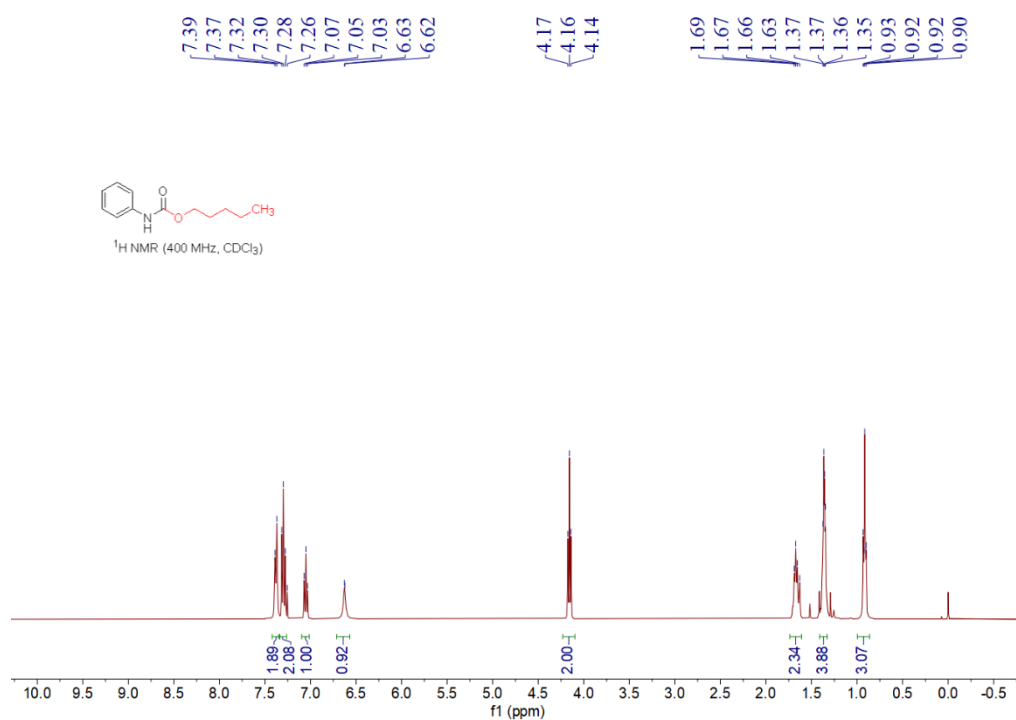

### $^1\text{H}$ NMR spectra of **8c**

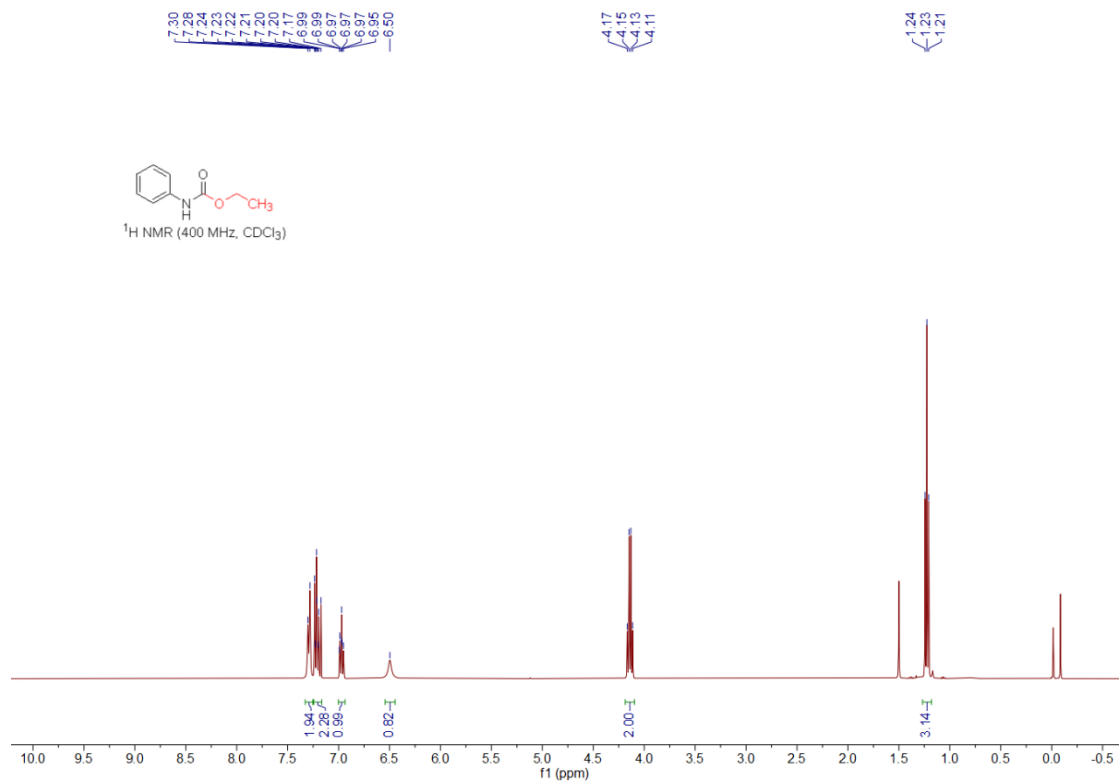

### $^1\text{H}$ NMR spectra of **8d**

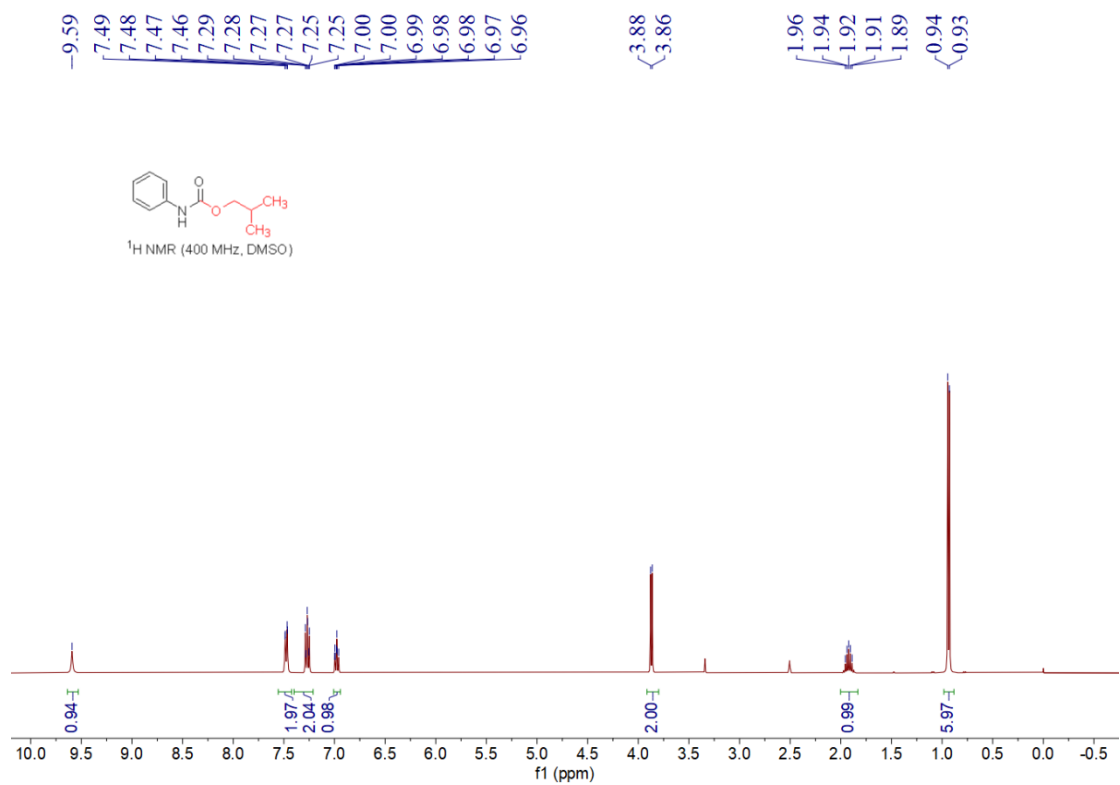

<sup>1</sup>H NMR spectra of **8e**

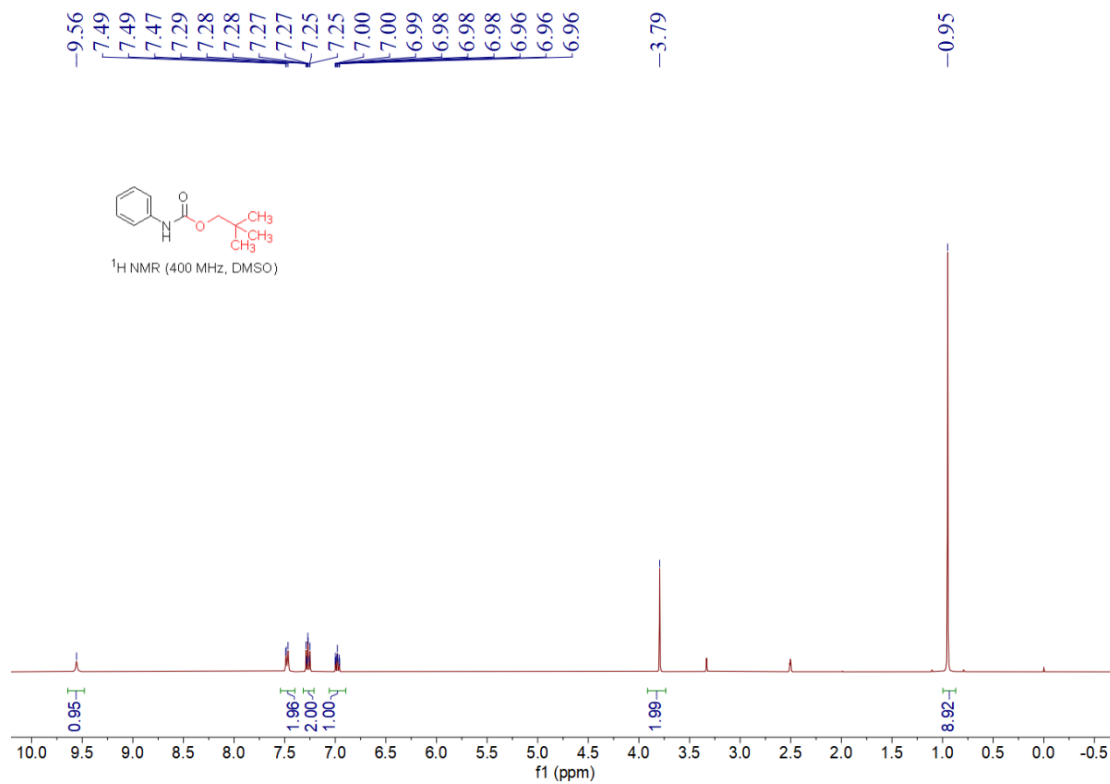

<sup>1</sup>H NMR spectra of **8f**

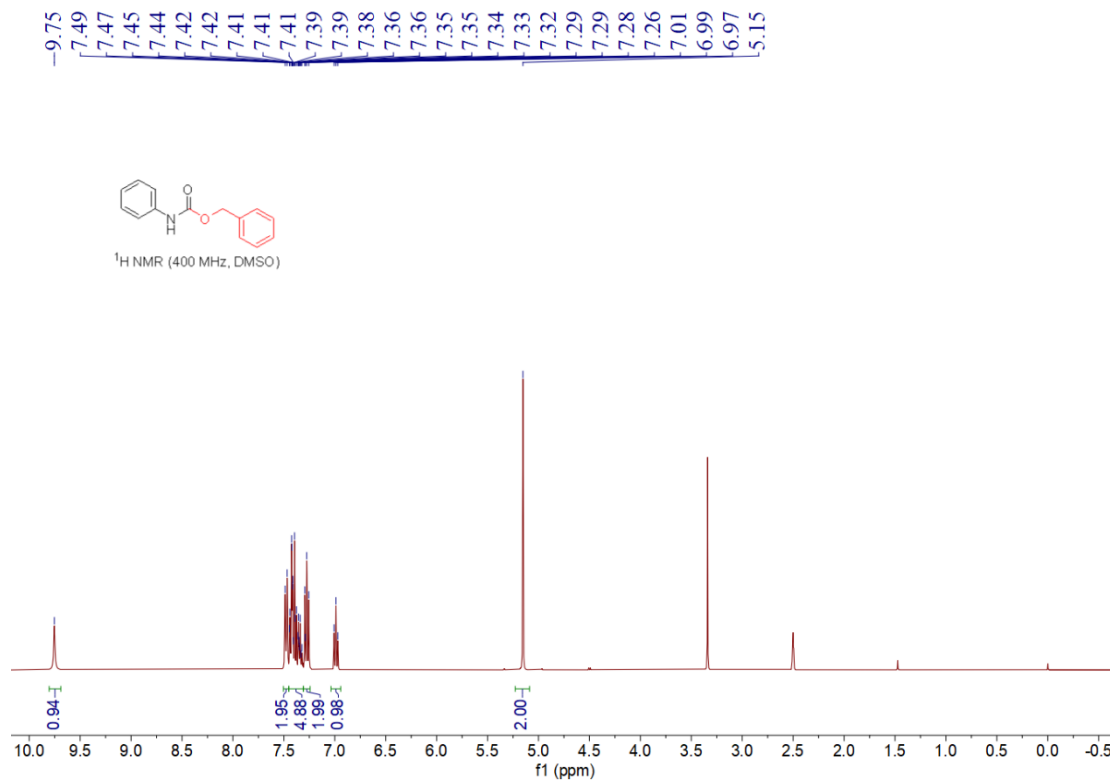

### <sup>1</sup>H NMR spectra of **8g**

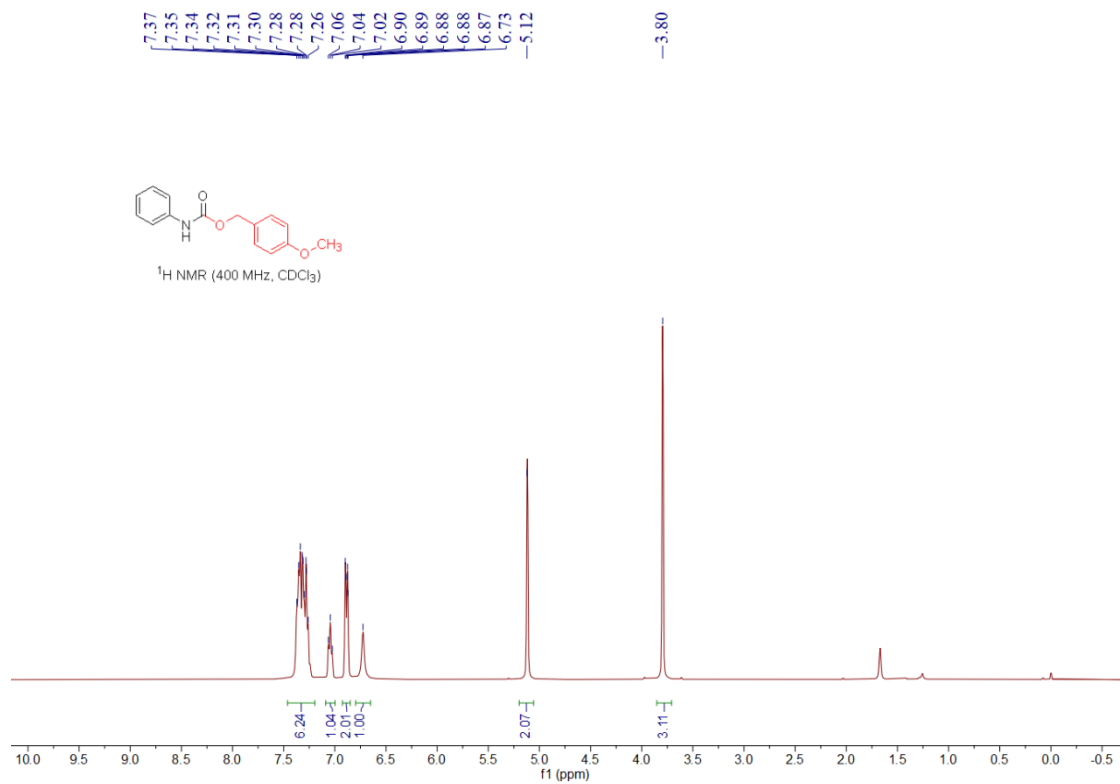

### <sup>1</sup>H NMR spectra of **8h**

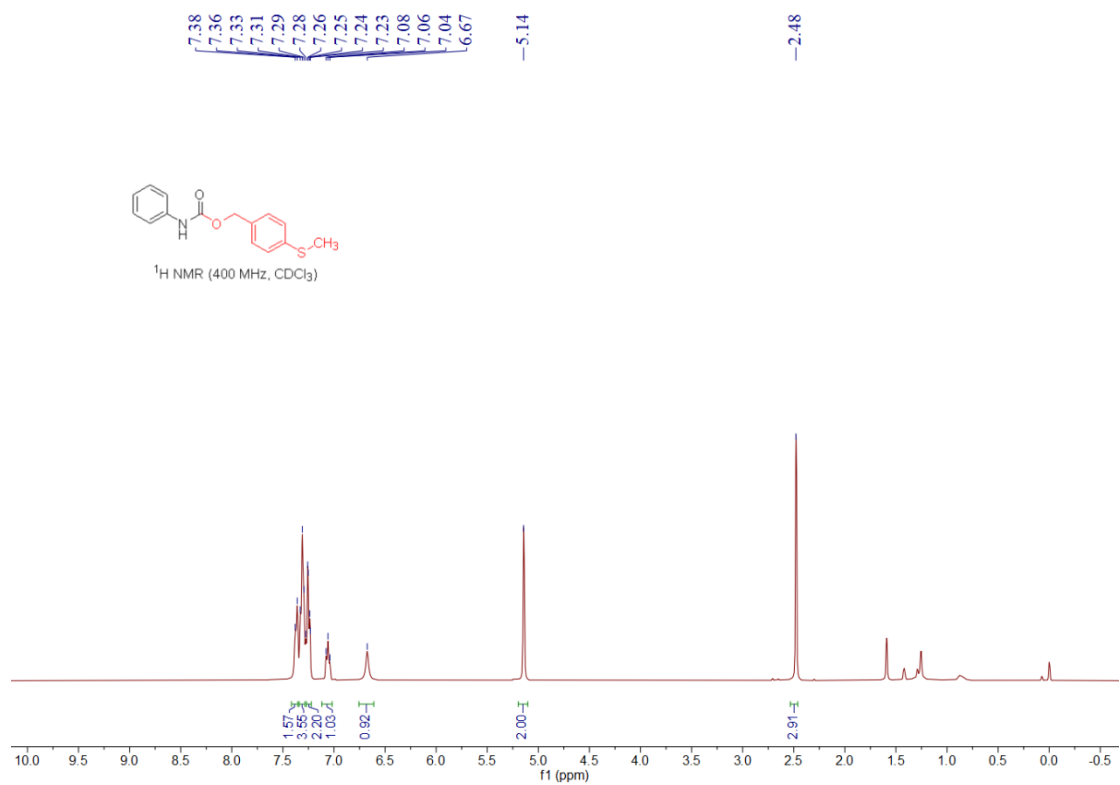



## <sup>13</sup>C NMR spectra of **8h**

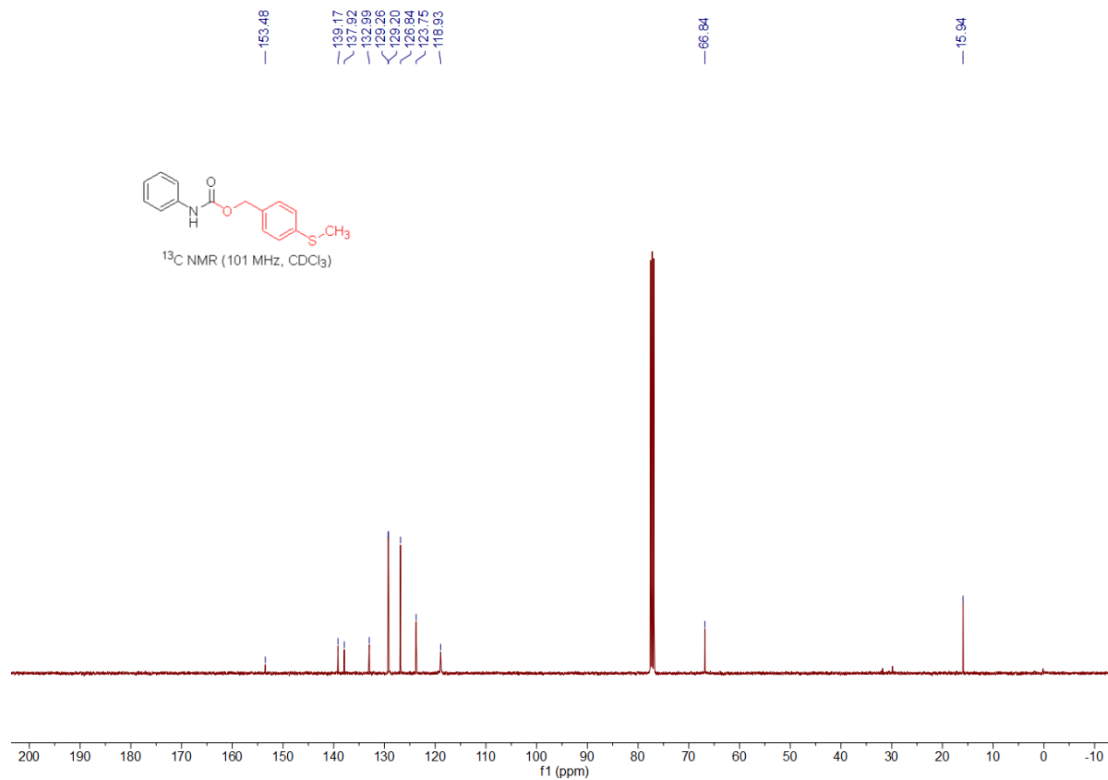

## HRMS spectra of **8h**

Monoisotopic Mass, Even Electron Ions

836 formula(e) evaluated with 1 results within limits (up to 50 best isotopic matches for each mass)

Elements Used:

C: 15-15 H: 15-15 N: 0-100 O: 0-100 Na: 0-1 S: 1-4

25

240403-13-8 11 (0.076)

1: TOF MS ES+  
1.02e+005

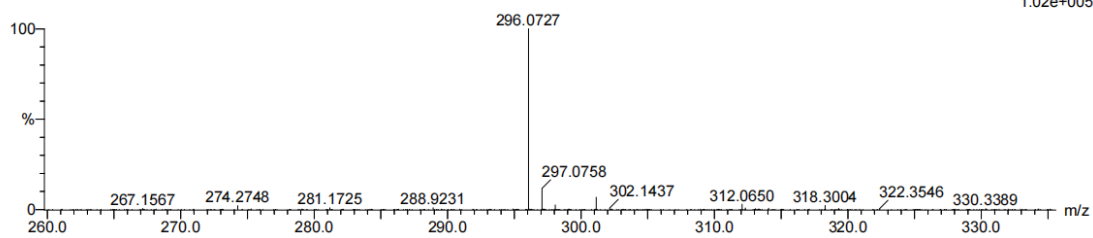

### <sup>1</sup>H NMR spectra of **8i**

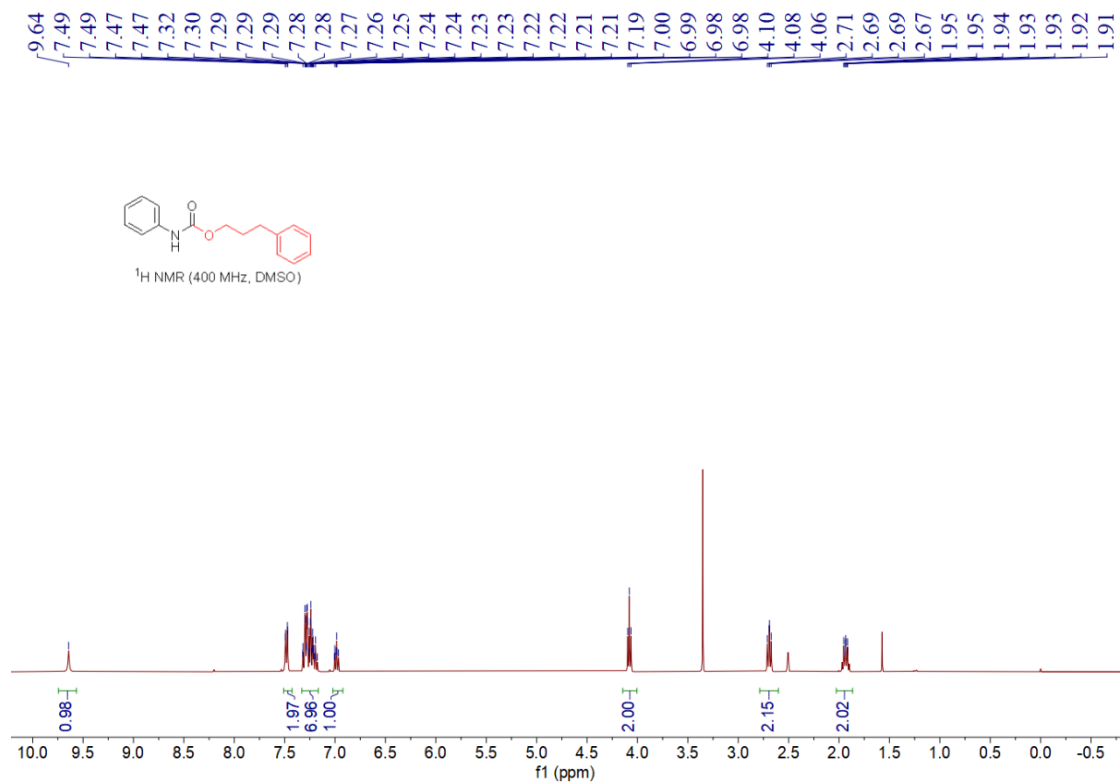

### <sup>1</sup>H NMR spectra of **8j**

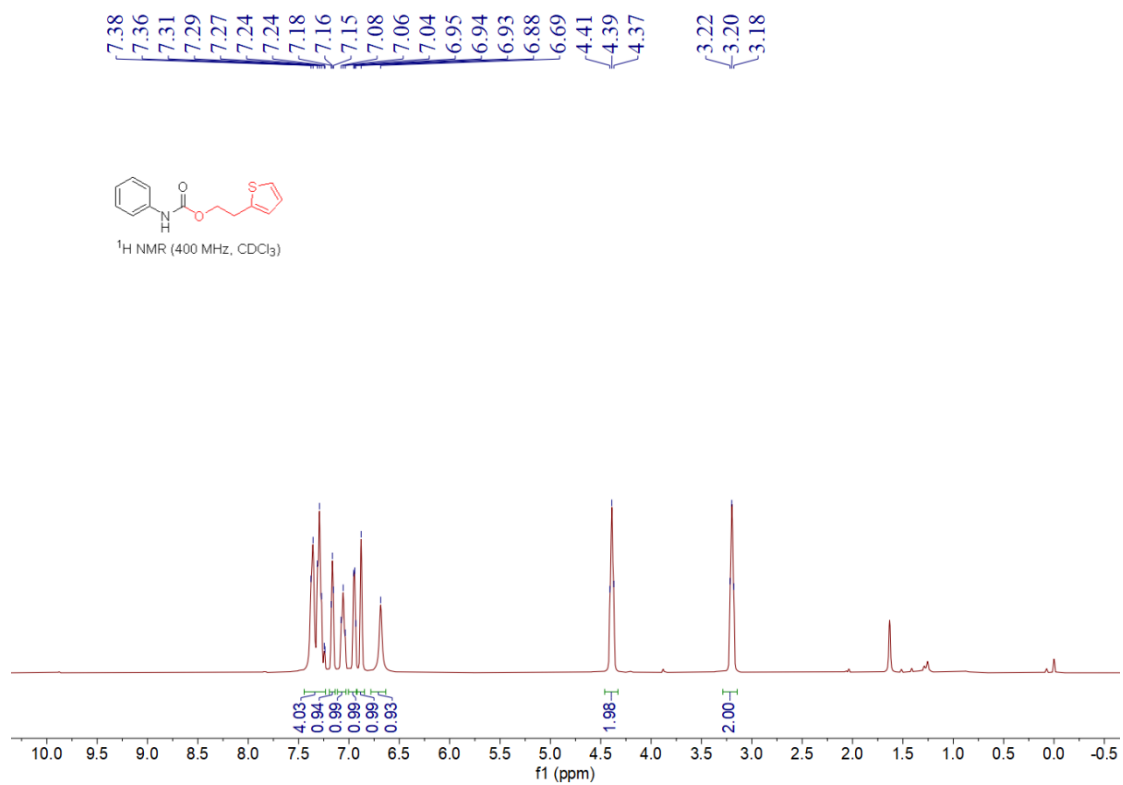

## <sup>13</sup>C NMR spectra of **8j**

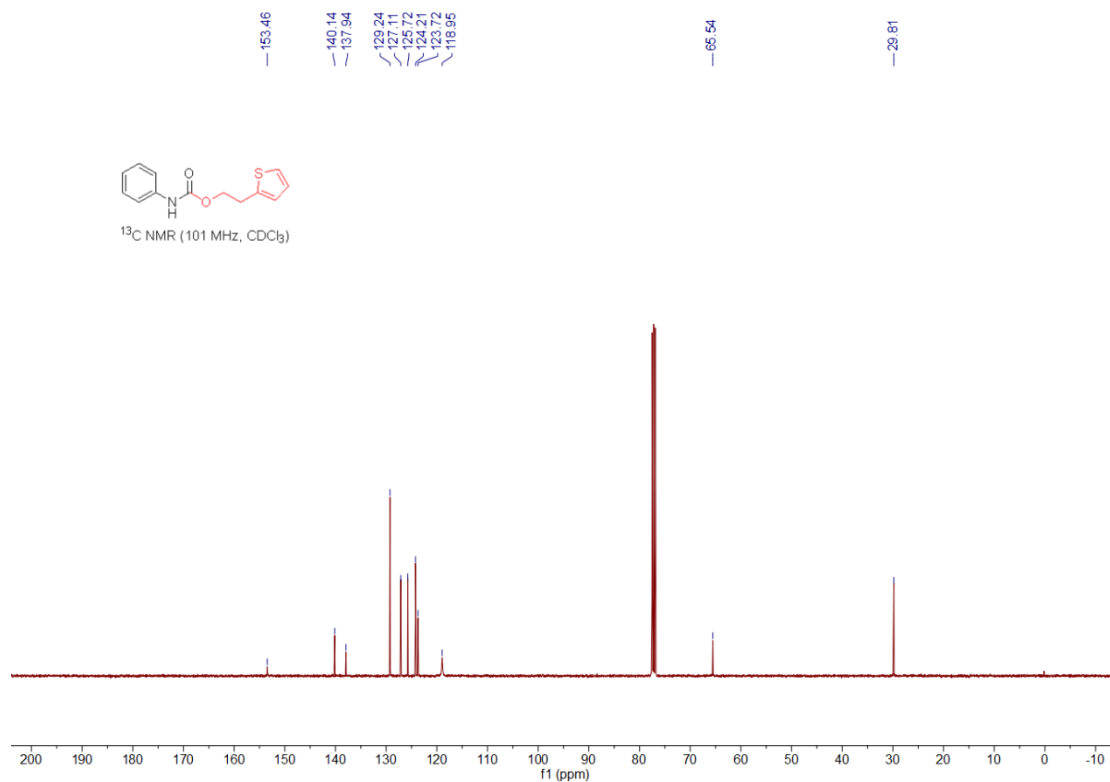

## HRMS spectra of **8j**

Monoisotopic Mass, Even Electron Ions

647 formula(e) evaluated with 1 results within limits (up to 50 best isotopic matches for each mass)

Elements Used:

C: 13-13 H: 13-13 N: 0-100 O: 0-100 Na: 0-1 S: 1-4

25

240403-13-10 19 (0.105)

1: TOF MS ES+  
2.75e+04

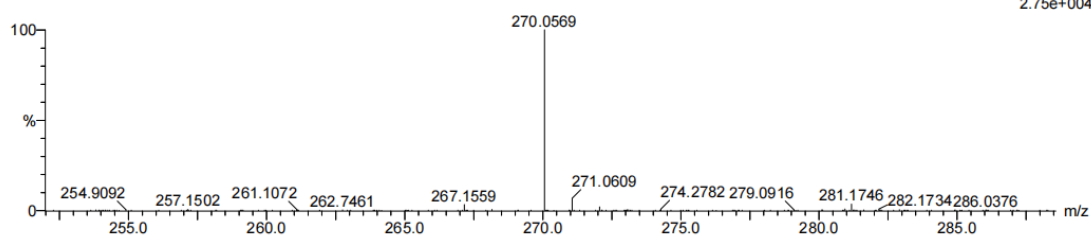

<sup>1</sup>H NMR spectra of **8k**

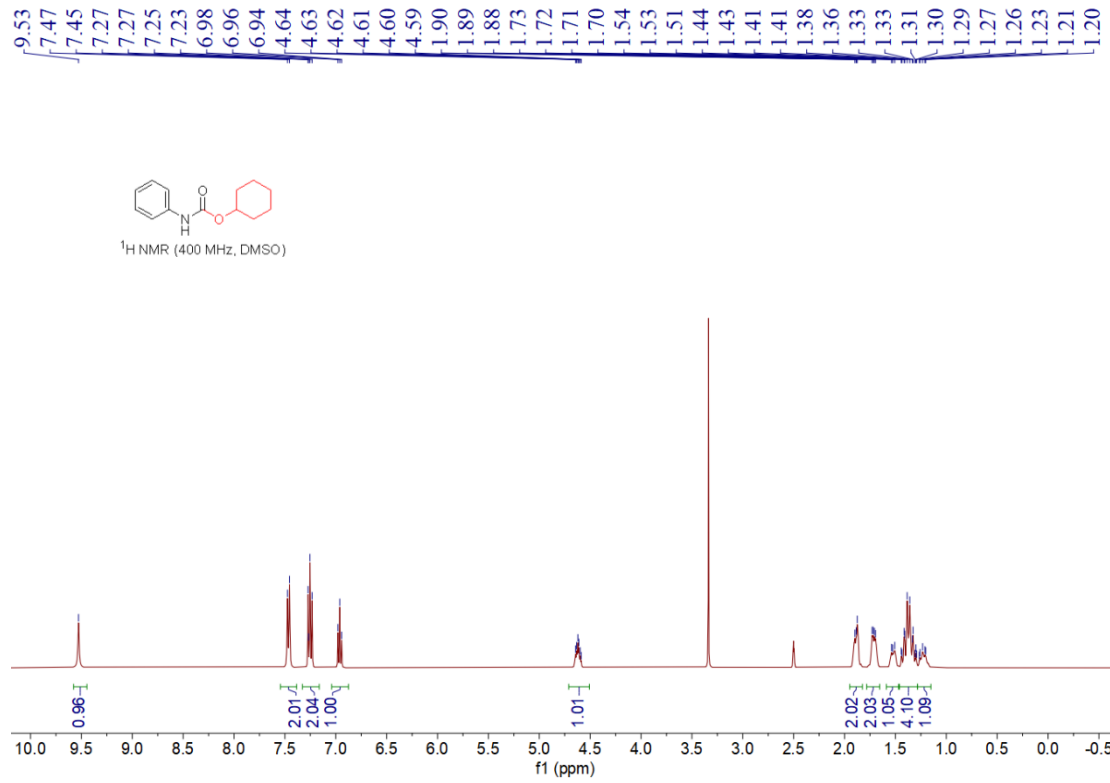

<sup>1</sup>H NMR spectra of **8l**

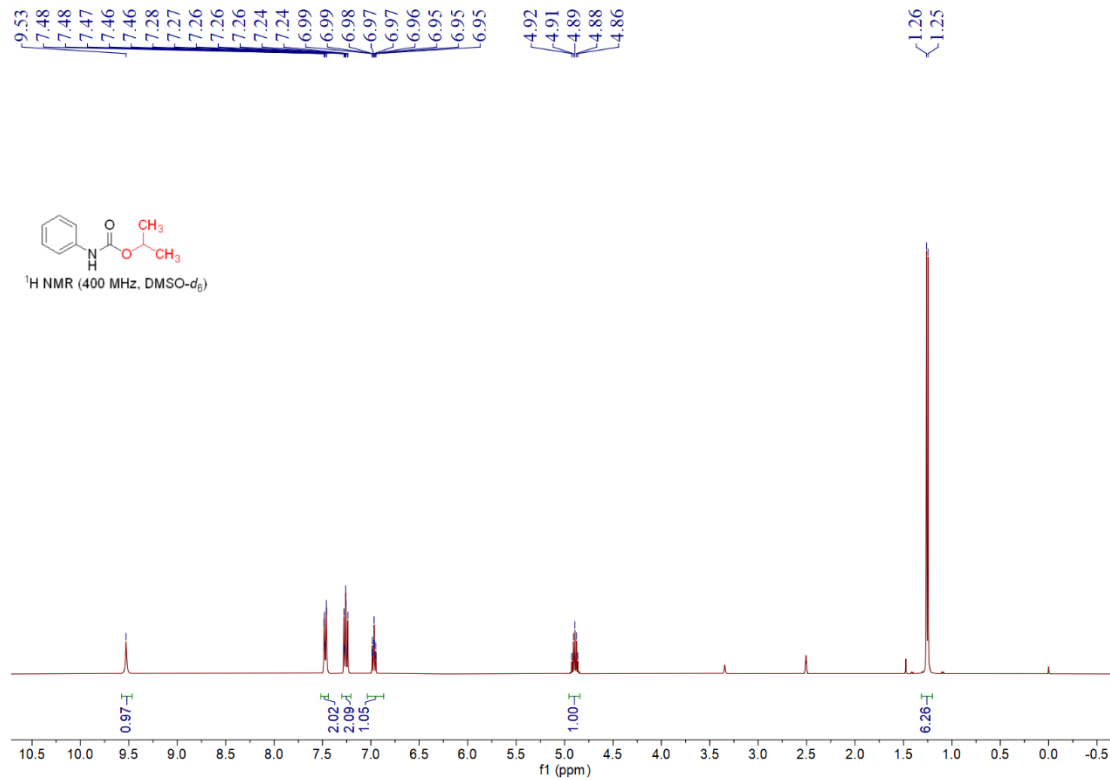

### $^1\text{H}$ HRMS spectra of **8m**

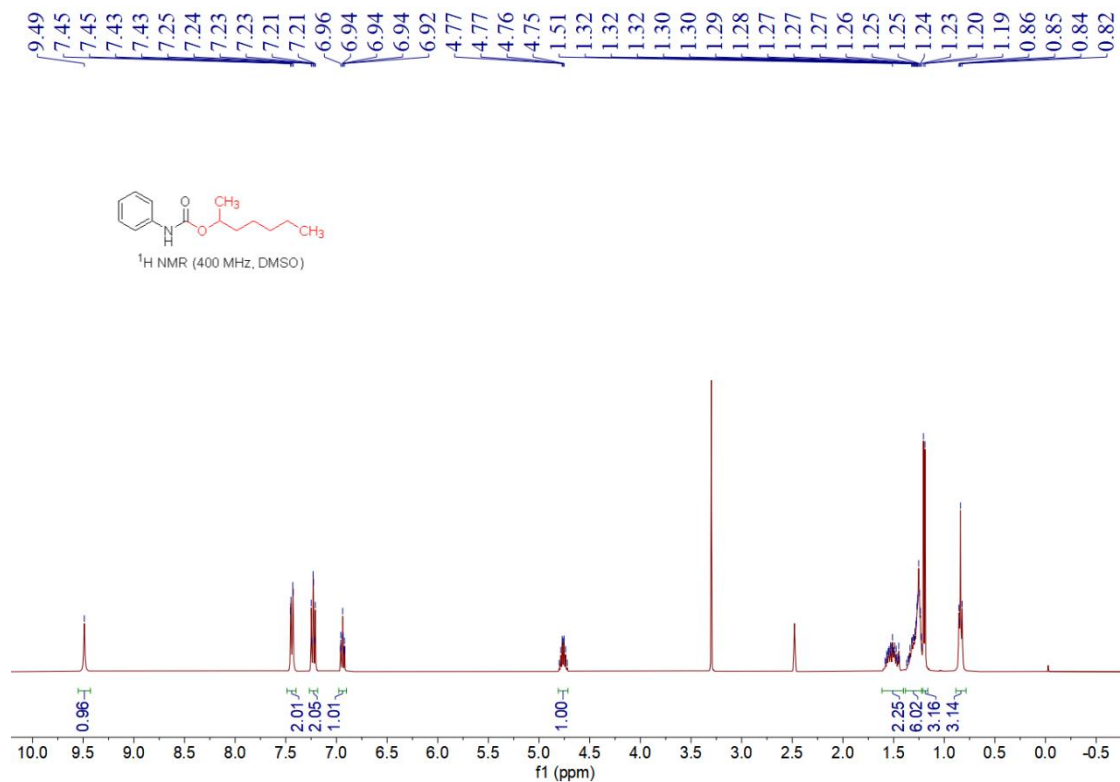

### $^{13}\text{C}$ NMR spectra of **8m**

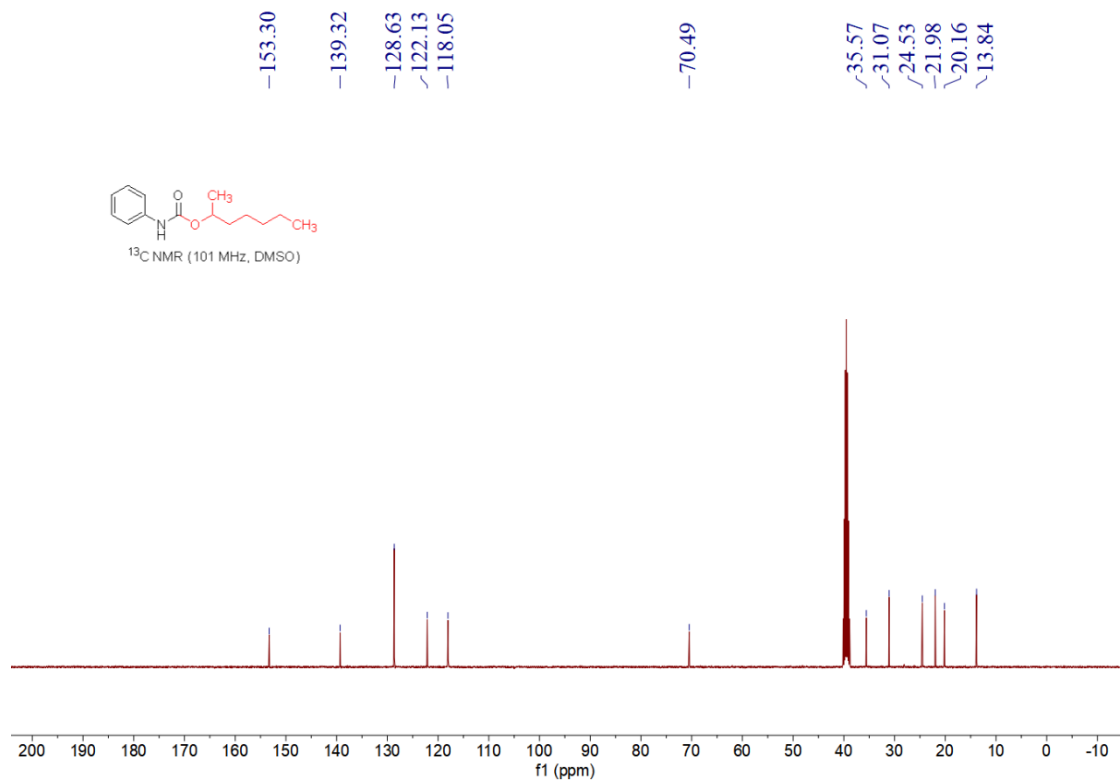

## HRMS spectra of **8m**

Monoisotopic Mass, Even Electron Ions

270 formula(e) evaluated with 1 results within limits (up to 50 best isotopic matches for each mass)

Elements Used:

C: 14-14 H: 21-21 N: 0-100 O: 0-100 Na: 0-1

25

240403-13-13 51 (0.239)

1: TOF MS ES+  
6.30e+004

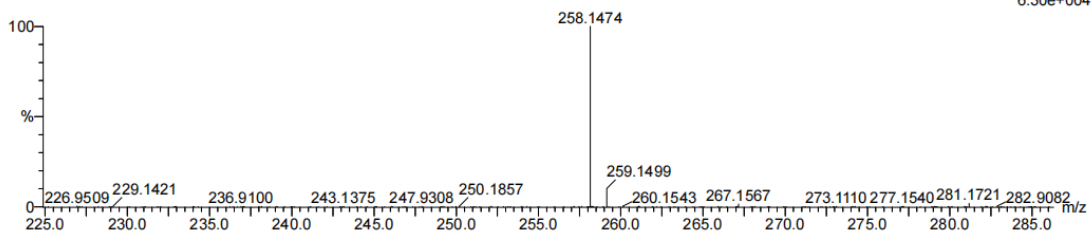

## <sup>1</sup>H NMR spectra of **8n**

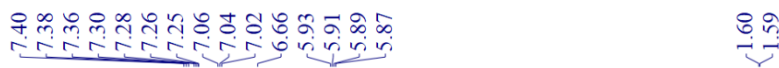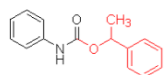

<sup>1</sup>H NMR (400 MHz, CDCl<sub>3</sub>)

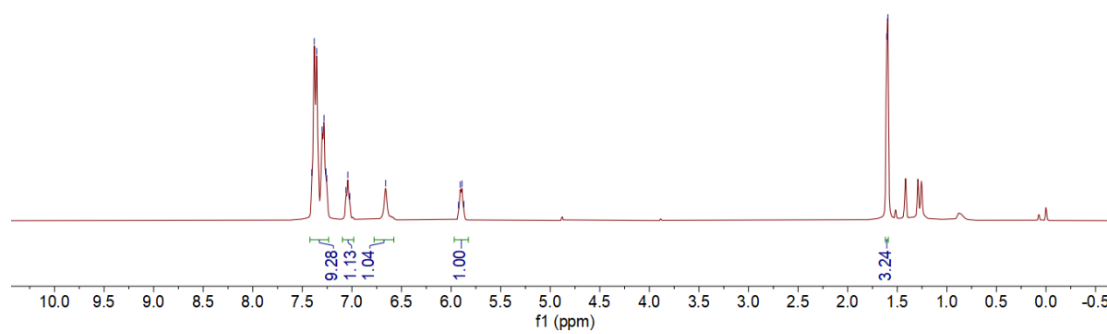

## <sup>1</sup>H NMR spectra of **80**

9.73  
7.49  
7.49  
7.48  
7.48  
7.47  
7.47  
7.29  
7.28  
7.27  
7.27  
7.25  
7.25  
7.00  
7.00  
7.00  
6.99  
6.98  
6.98  
6.96  
4.21  
4.20  
4.20  
4.20  
4.19  
4.19  
4.18  
4.18  
3.61  
3.60  
3.60  
3.60  
3.60  
3.59  
3.59  
3.50  
3.48  
3.46  
3.44  
1.14  
1.12  
1.10

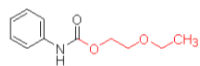

<sup>1</sup>H NMR (400 MHz, DMSO)

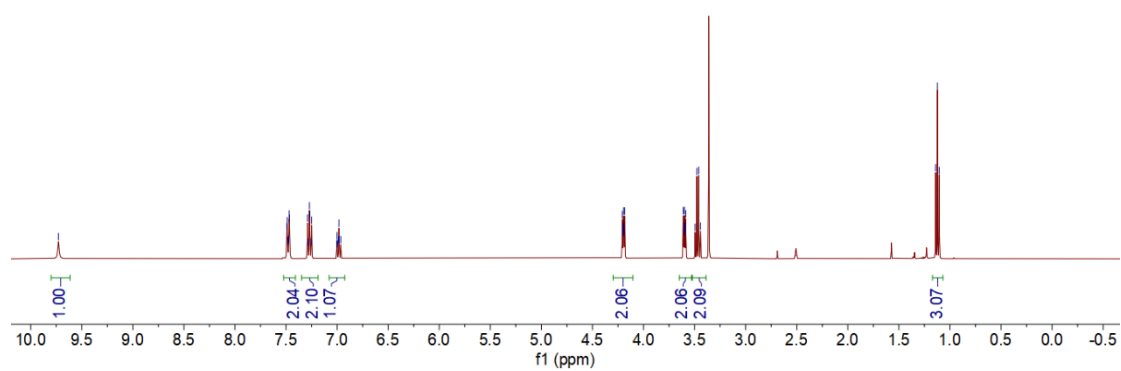

## <sup>13</sup>C NMR spectra of **80**

-153.95  
-139.63  
-129.17  
-122.79  
-118.60  
68.54  
65.99  
64.01  
-15.51

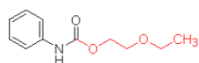

<sup>13</sup>C NMR (101 MHz, DMSO)

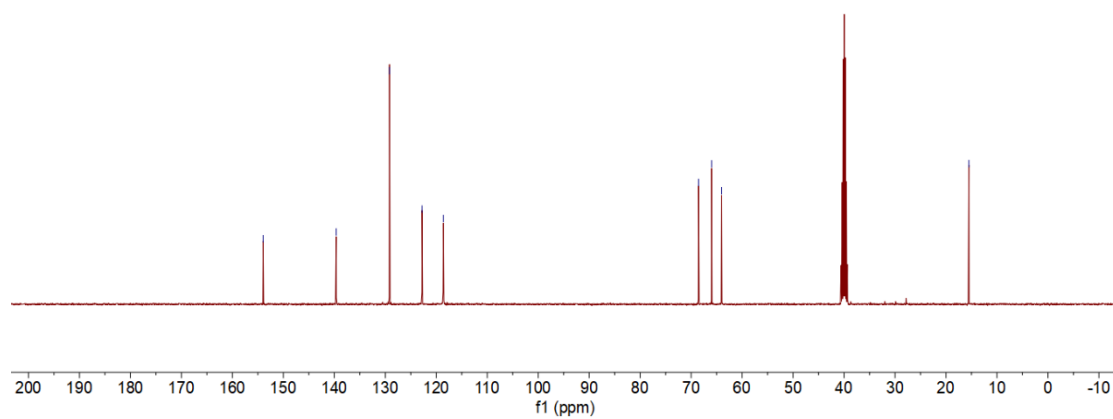

## HRMS spectra of **8o**

Monoisotopic Mass, Even Electron Ions

212 formula(e) evaluated with 1 results within limits (up to 50 best isotopic matches for each mass)

Elements Used:

C: 11-11 H: 15-15 N: 0-100 O: 0-100 Na: 0-1

25

240403-13-15 22 (0.115)

1: TOF MS ES+  
7.12e+005

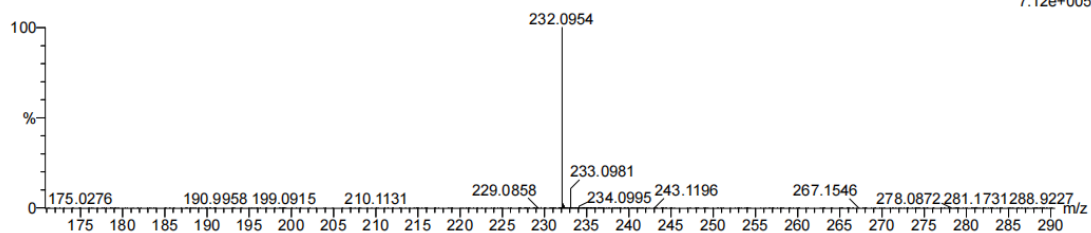

## <sup>1</sup>H NMR spectra of **8p**

7.14  
7.13  
7.12  
7.10  
7.10  
6.69  
6.67  
6.65  
6.61  
6.59  
3.78  
3.77  
3.76  
3.26  
3.24  
3.23

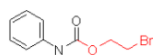

<sup>1</sup>H NMR (400 MHz, CDCl<sub>3</sub>)

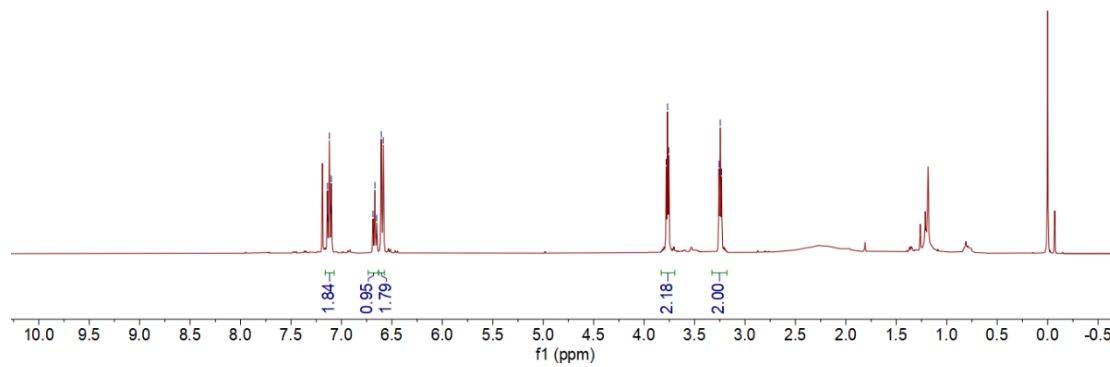



## <sup>13</sup>C NMR spectra of **8p**

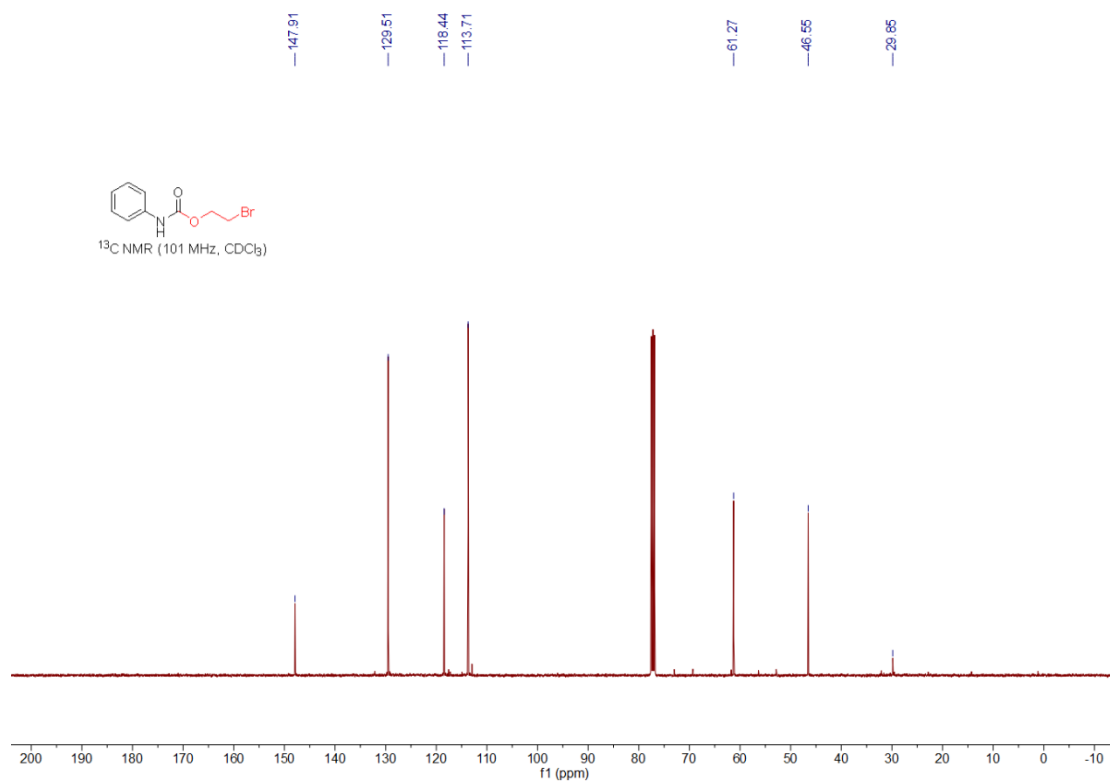

## HRMS spectra of **8p**

Monoisotopic Mass, Even Electron Ions

193 formula(e) evaluated with 1 results within limits (up to 50 best isotopic matches for each mass)

Elements Used:

C: 9-9 H: 10-10 N: 0-100 O: 0-100 Na: 0-1 Br: 1-2

25

240403-13-16 91 (0.401)

1: TOF MS ES+  
6.70e+001

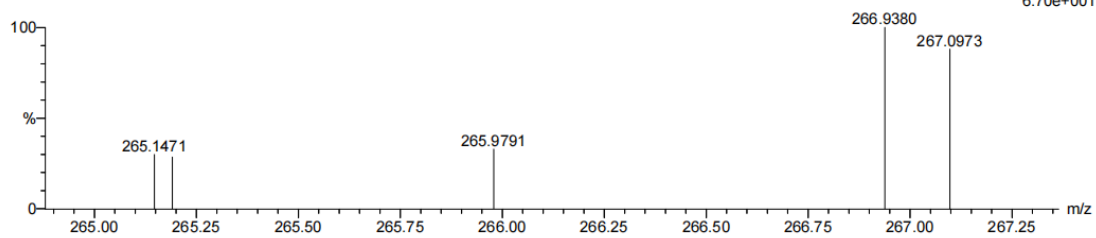

### <sup>1</sup>H NMR spectra of **8q**

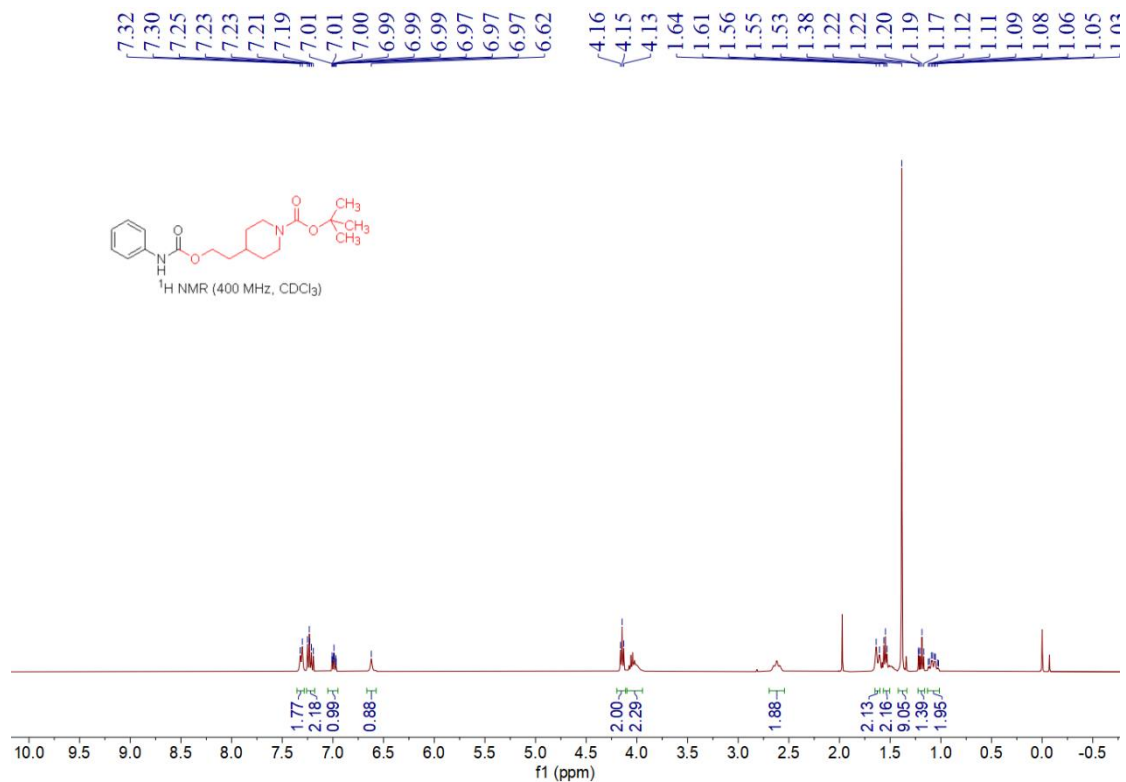

### <sup>13</sup>C NMR spectra of **8q**

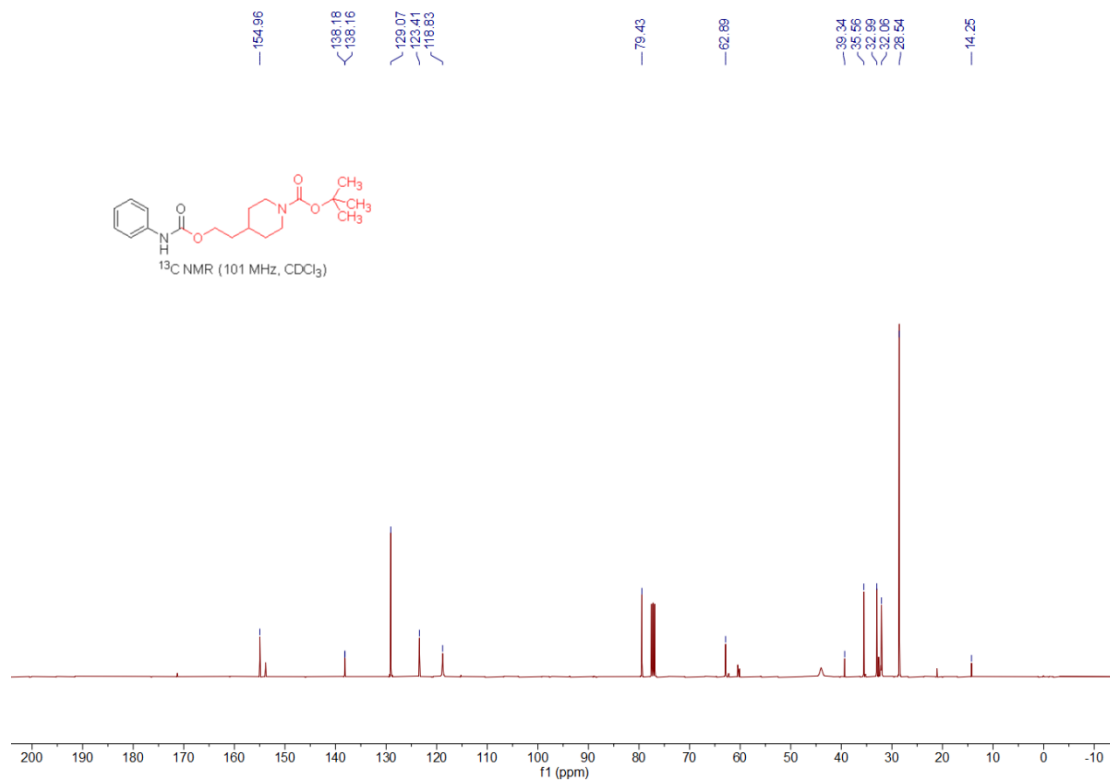

## HRMS spectra of **8q**

Monoisotopic Mass, Even Electron Ions

548 formula(e) evaluated with 1 results within limits (up to 50 best isotopic matches for each mass)

Elements Used:

C: 19-19 H: 28-28 N: 0-100 O: 0-100 Na: 0-1

25

240403-13-17 19 (0.105)

1: TOF MS ES+  
3.69e+005

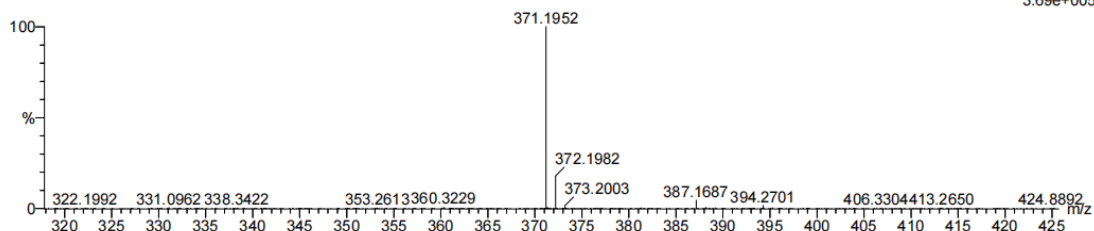

## <sup>1</sup>H NMR spectra of **8r**

7.30  
7.29  
7.28  
7.27  
7.26  
7.25  
7.24  
7.23  
7.22  
7.21  
7.20  
7.19  
7.18  
6.99  
6.98  
6.97  
6.95  
6.95  
6.93  
6.91  
5.54  
5.53  
5.53  
5.52  
5.52  
5.52  
5.51  
5.51  
5.50  
5.50  
5.49  
5.49  
4.48  
1.70  
1.69  
1.67  
1.66

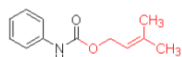

<sup>1</sup>H NMR (400 MHz, CDCl<sub>3</sub>)

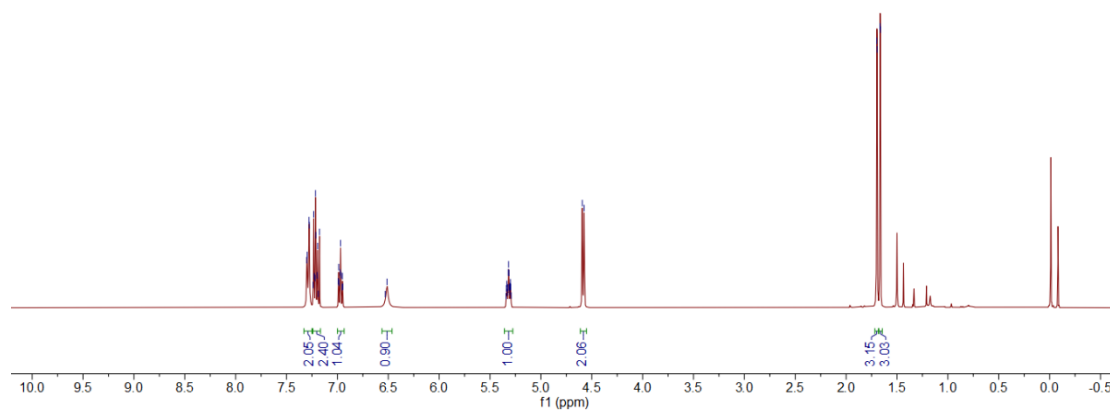

### <sup>1</sup>H NMR spectra of **8s**

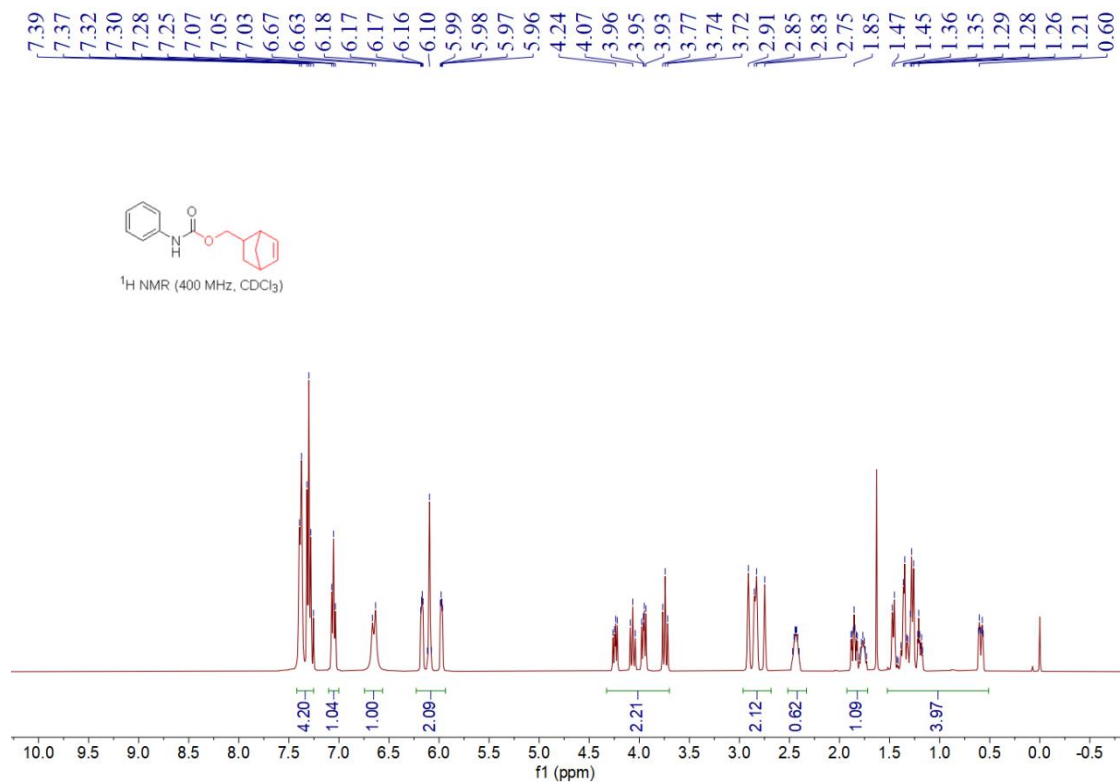

### <sup>13</sup>C NMR spectra of **8s**

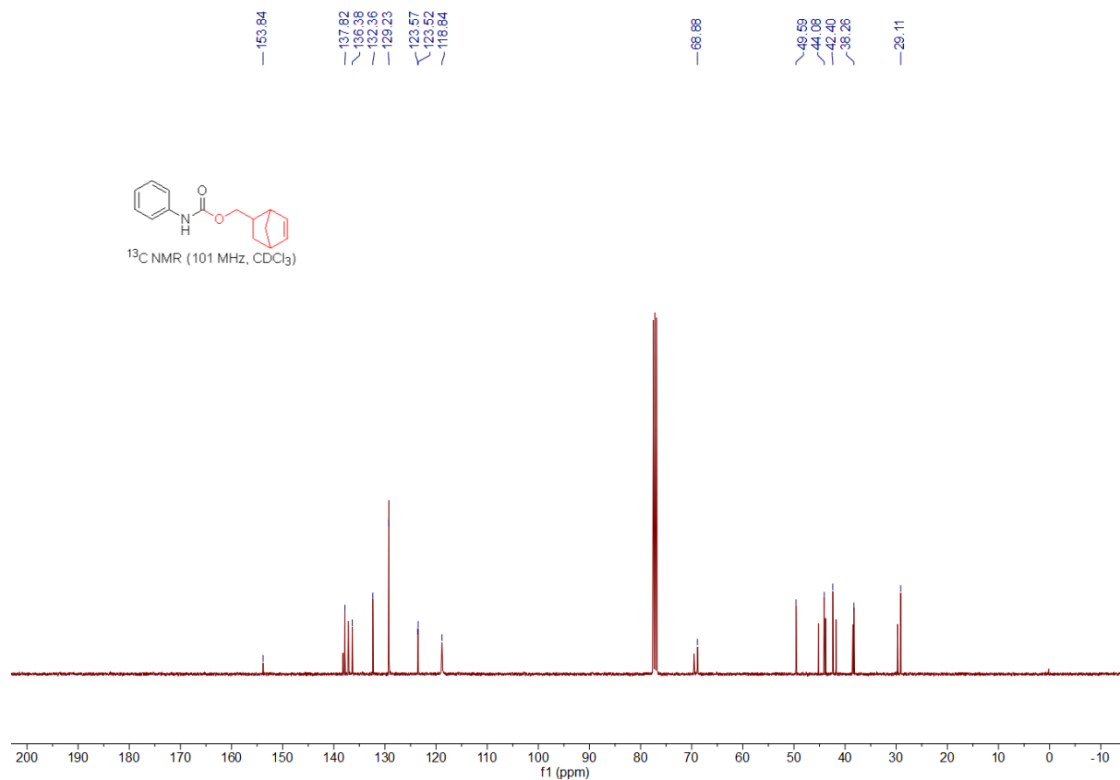

## HRMS spectra of **8s**

Monoisotopic Mass, Even Electron Ions

292 formula(e) evaluated with 1 results within limits (up to 50 best isotopic matches for each mass)

Elements Used:

C: 15-15 H: 17-17 N: 0-100 O: 0-100 Na: 0-1

25

240403-13-19 13 (0.083)

1: TOF MS ES+  
6.62e+005

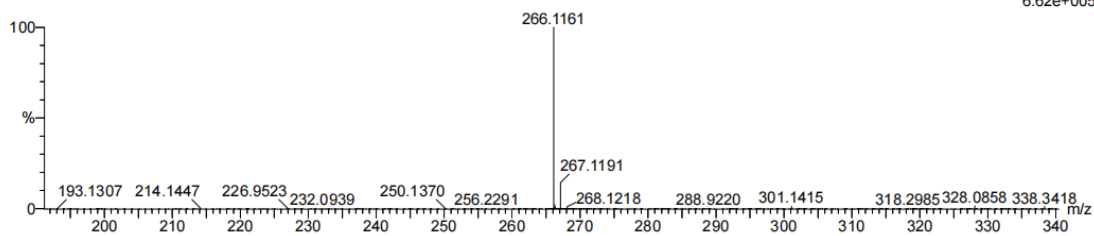

## <sup>1</sup>H NMR spectra of **8t**

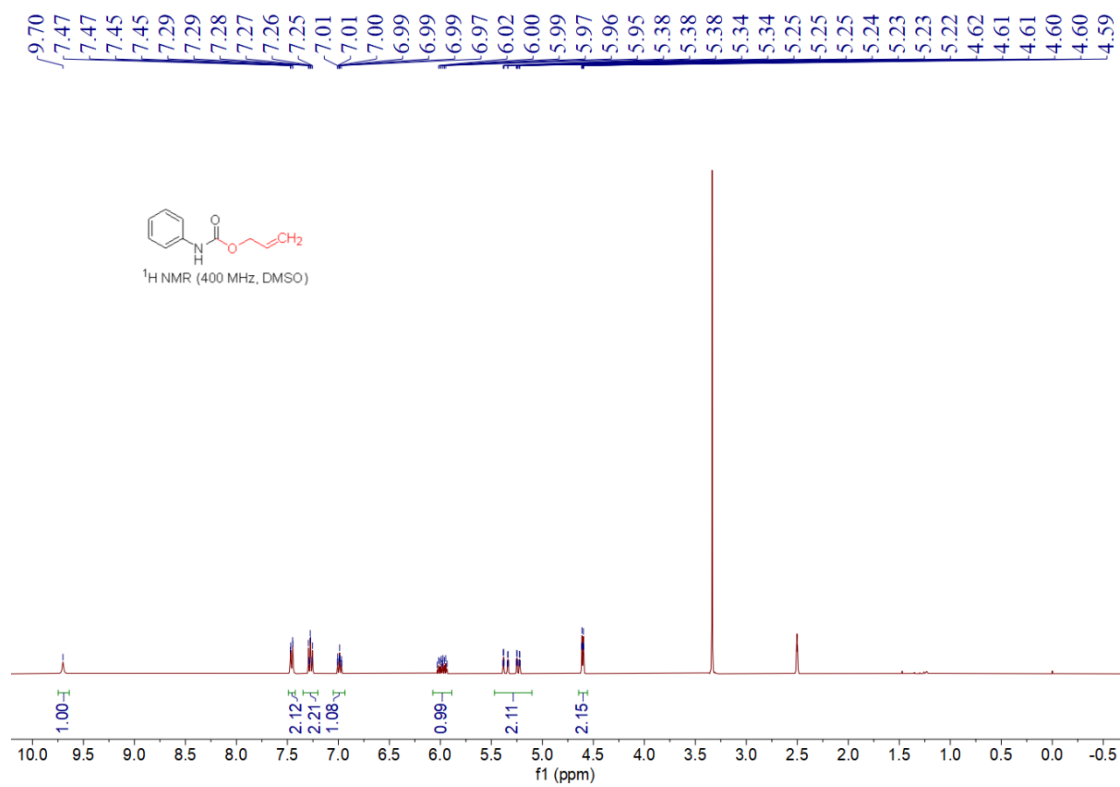

### $^1\text{H}$ NMR spectra of **8u**

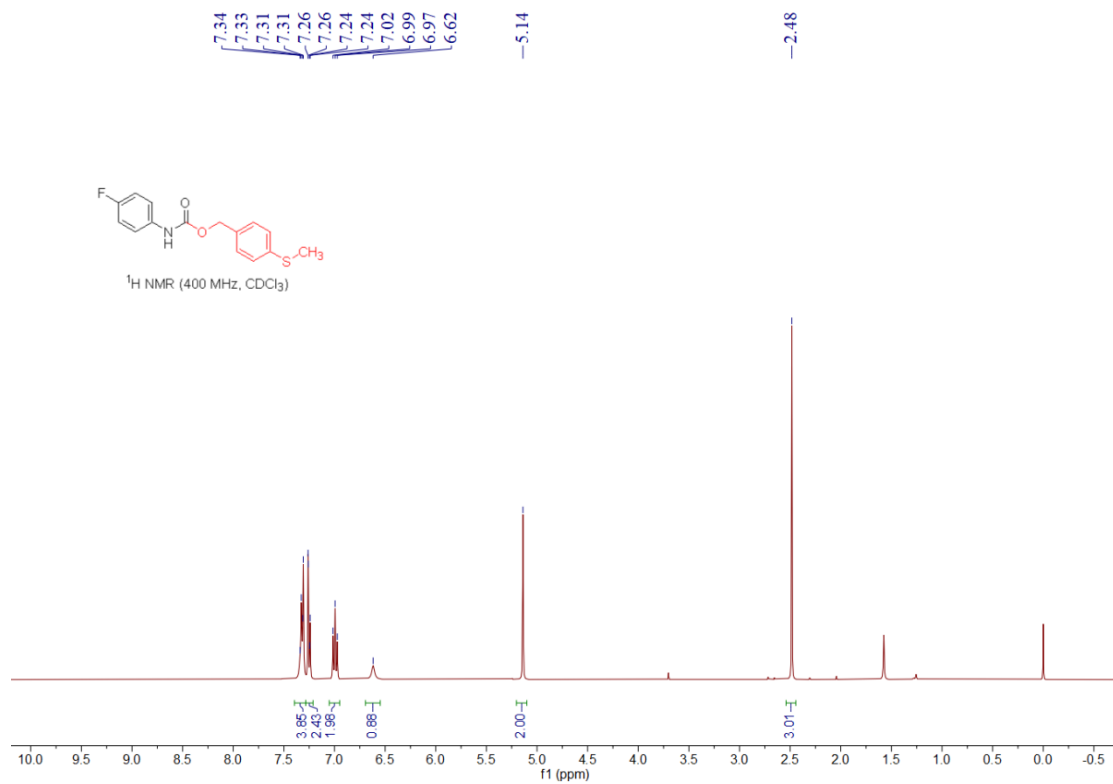

### $^{13}\text{C}$ NMR spectra of **8u**

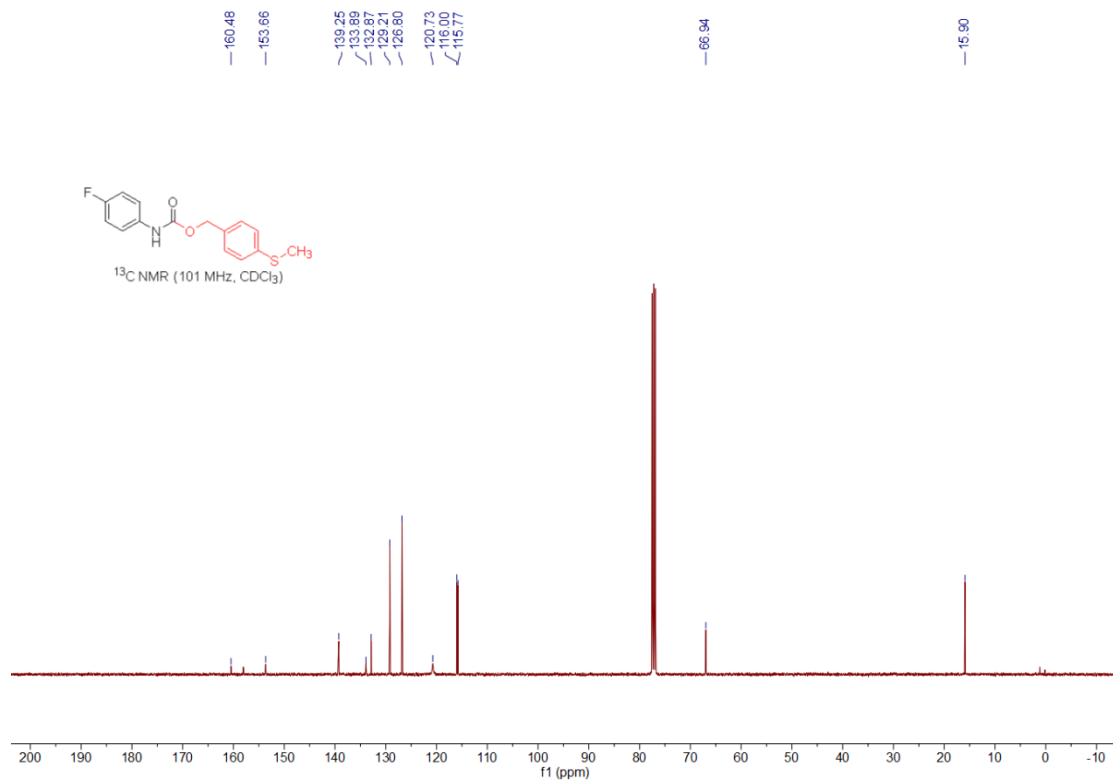

## HRMS spectra of **8u**

Monoisotopic Mass, Even Electron Ions

830 formula(e) evaluated with 1 results within limits (up to 50 best isotopic matches for each mass)

Elements Used:

C: 15-15 H: 14-14 N: 0-100 O: 0-100 Na: 0-1 S: 1-4 F: 1-1

25

240403-13-21 10 (0.072)

1: TOF MS ES+  
7.31e+004

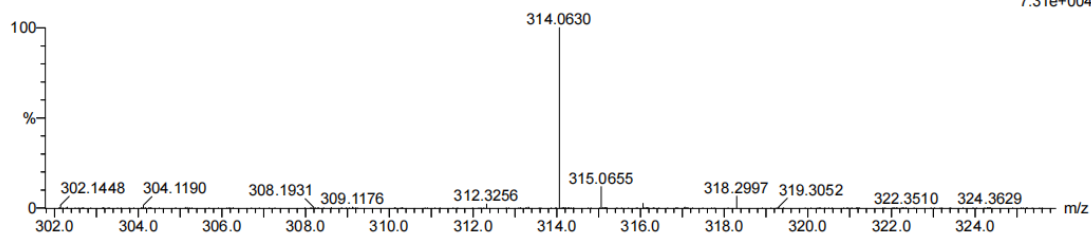

## <sup>1</sup>H NMR spectra of **8v**

7.33  
7.32  
7.31  
7.30  
7.26  
7.24  
7.24  
6.68

5.14

2.48

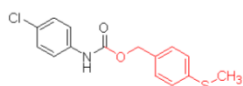

<sup>1</sup>H NMR (400 MHz, CDCl<sub>3</sub>)

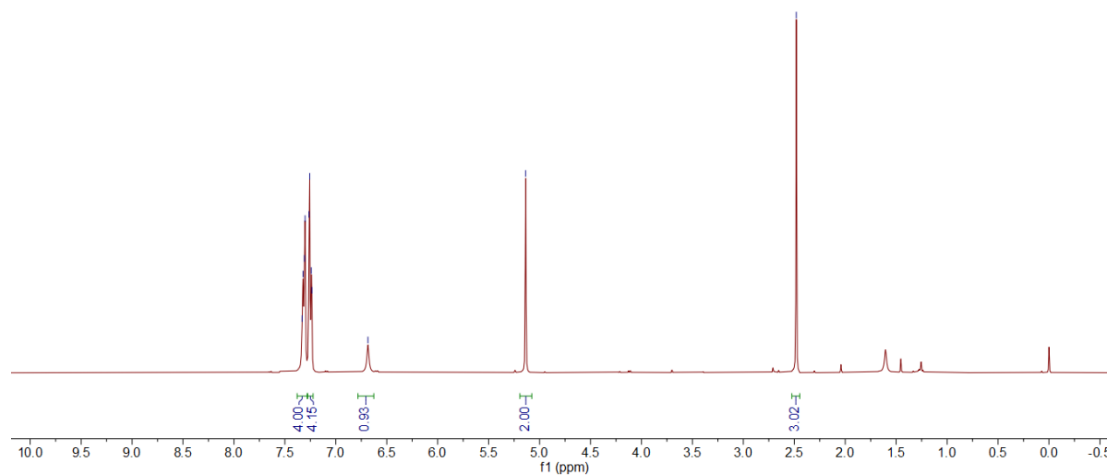

## <sup>13</sup>C NMR spectra of **8v**

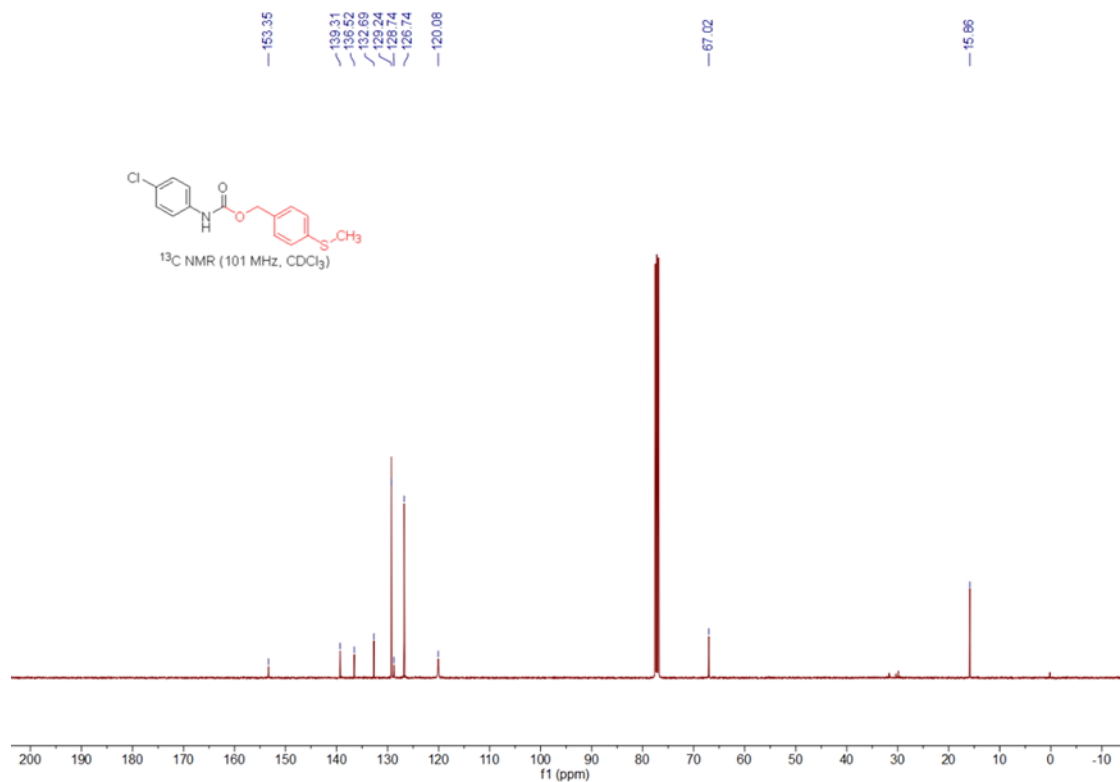

## HRMS spectra of **8v**

Monoisotopic Mass, Even Electron Ions

2251 formula(e) evaluated with 1 results within limits (up to 50 best isotopic matches for each mass)

Elements Used:

C: 15-15 H: 14-14 N: 0-100 O: 0-100 Na: 0-1 S: 1-4 Cl: 1-5

25

240403-13-22 10 (0.072)

1: TOF MS ES+  
3.49e+004

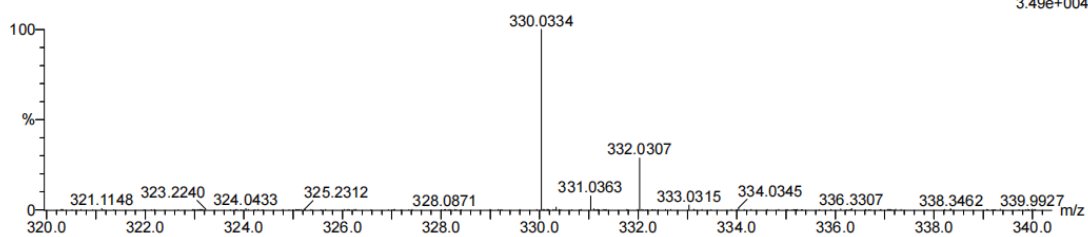



### $^1\text{H}$ NMR spectra of **8w**

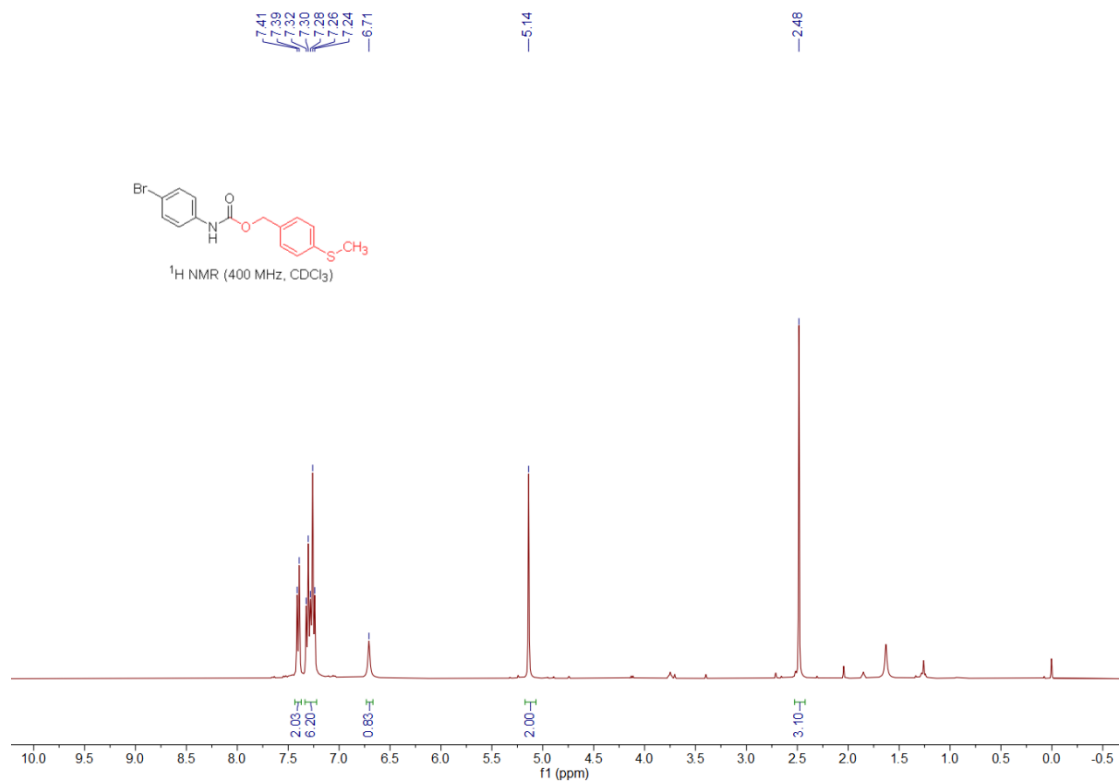

### $^{13}\text{C}$ NMR spectra of **8w**

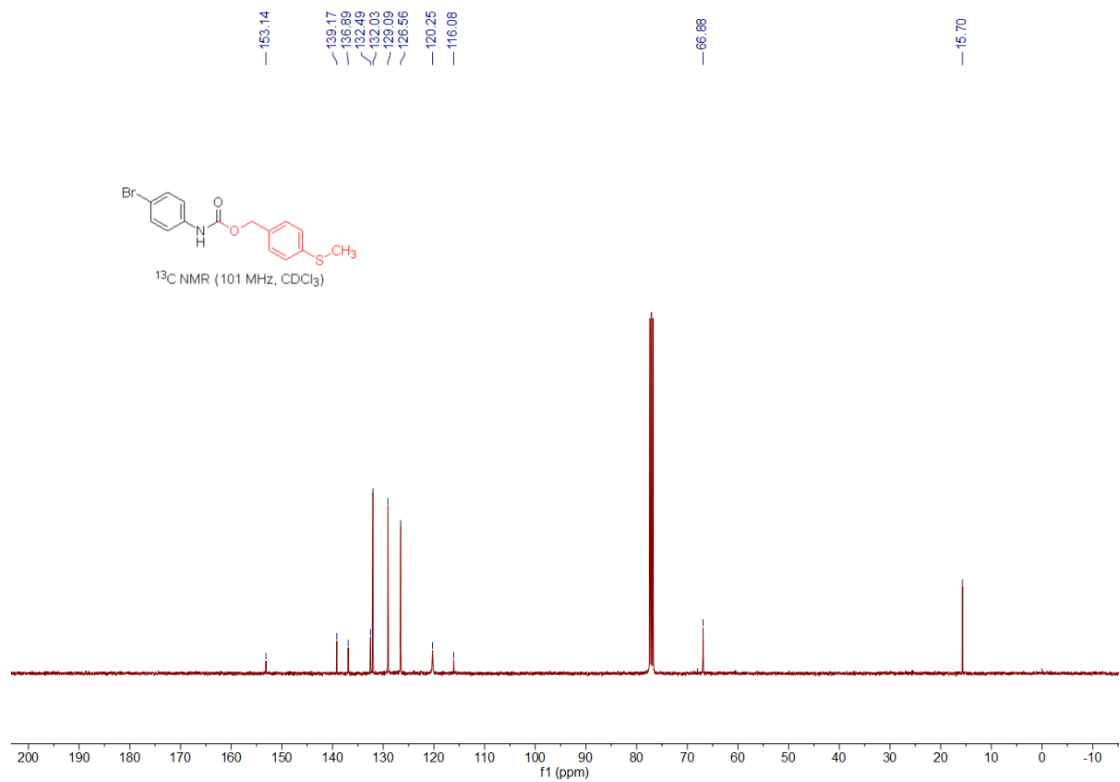

## HRMS spectra of **8w**

Monoisotopic Mass, Even Electron Ions

1205 formula(e) evaluated with 1 results within limits (up to 50 best isotopic matches for each mass)

Elements Used:

C: 15-15 H: 14-14 N: 0-100 O: 0-100 Na: 0-1 S: 1-4 Br: 1-2

25

240403-13-23 11 (0.076)

1: TOF MS ES+  
2.27e+004

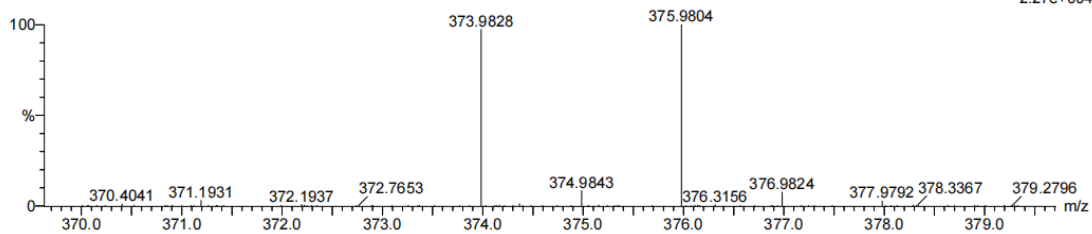

## <sup>1</sup>H NMR spectra of **8x**

7.33  
7.31  
7.26  
7.24  
7.07  
7.05  
7.03  
6.94  
6.59  
6.59  
6.57  
6.57  
6.39  
6.39  
6.37  
6.37  
5.13  
-3.68  
-2.48

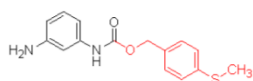

<sup>1</sup>H NMR (400 MHz, CDCl<sub>3</sub>)

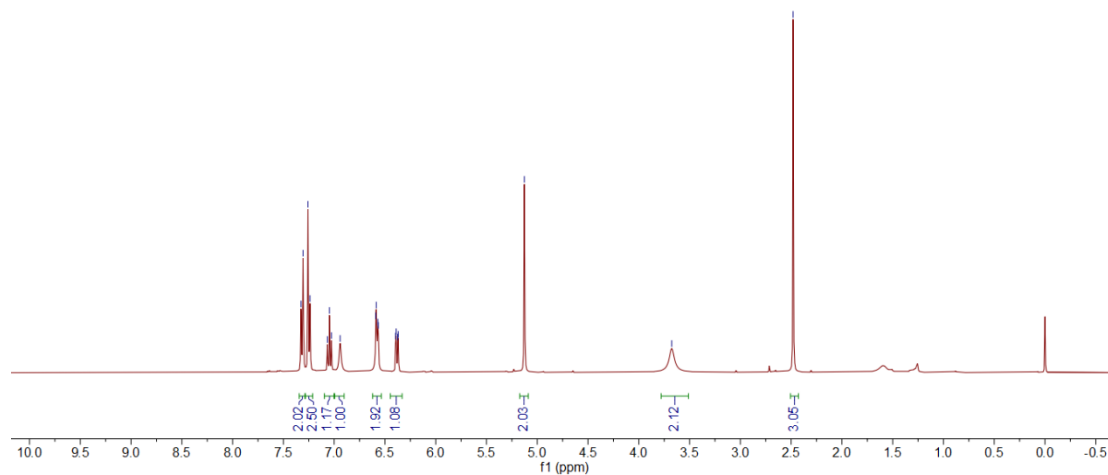

### <sup>13</sup>C NMR spectra of **8x**

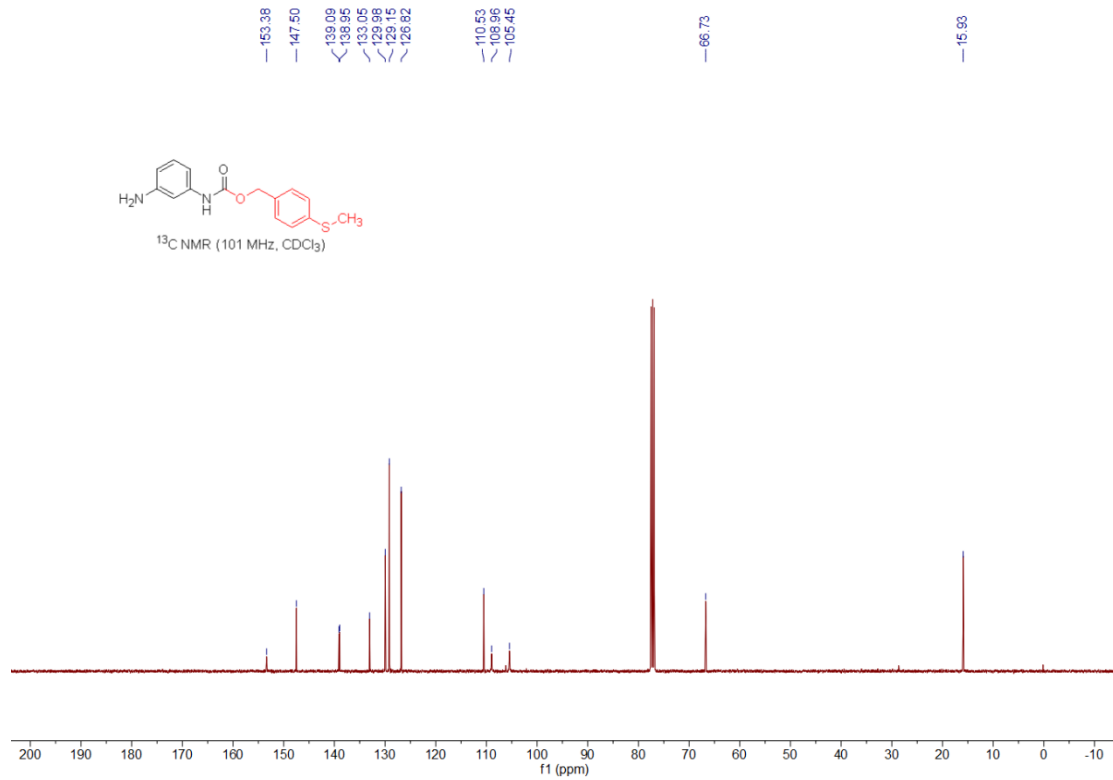

### HRMS spectra of **8x**

Monoisotopic Mass, Even Electron Ions

936 formula(e) evaluated with 1 results within limits (up to 50 best isotopic matches for each mass)

Elements Used:

C: 15-15 H: 16-16 N: 0-100 O: 0-100 Na: 0-1 S: 1-4

25

240403-13-24 12 (0.080)

1: TOF MS ES+  
1.37e+005

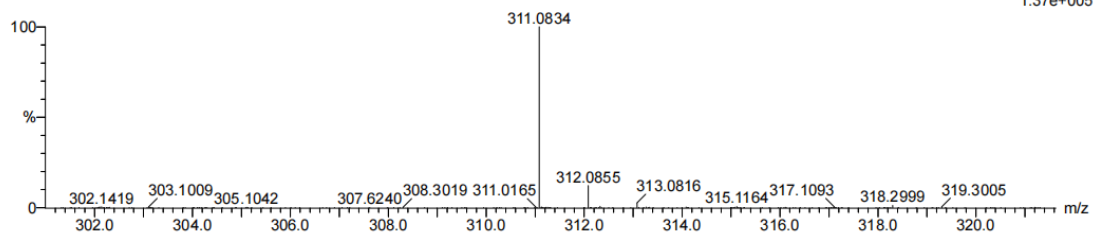

### $^1\text{H}$ NMR spectra of **8y**

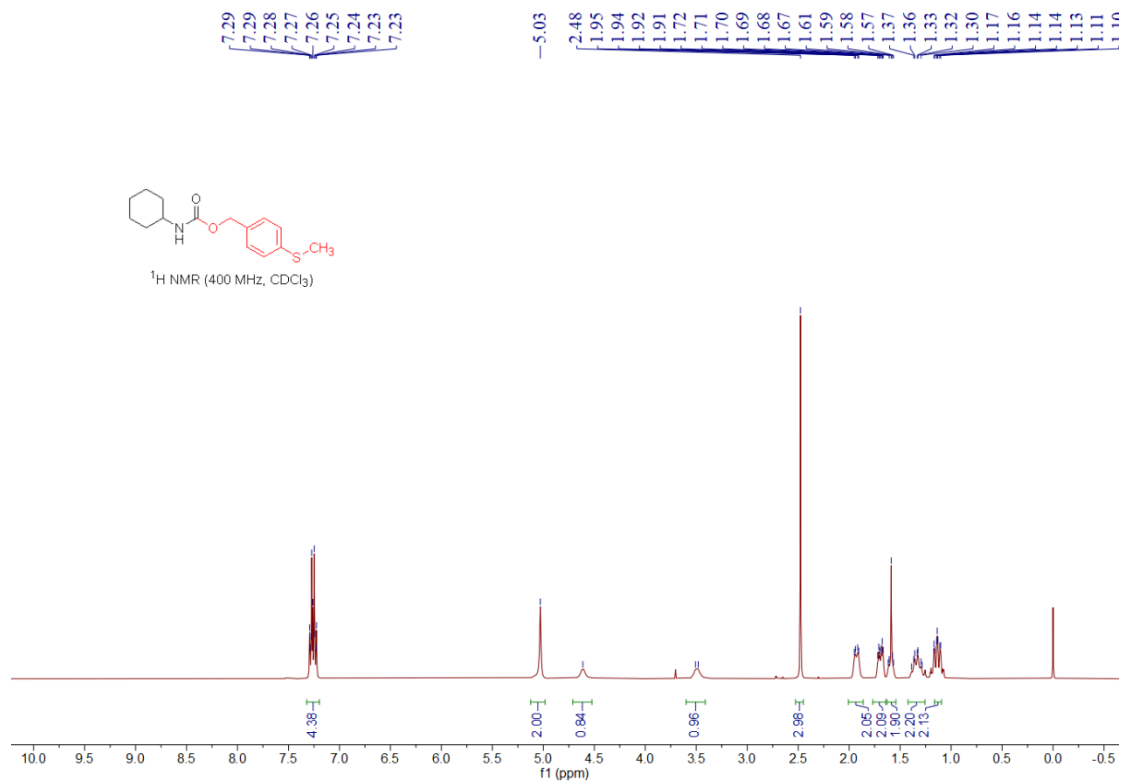

### $^{13}\text{C}$ NMR spectra of **8y**

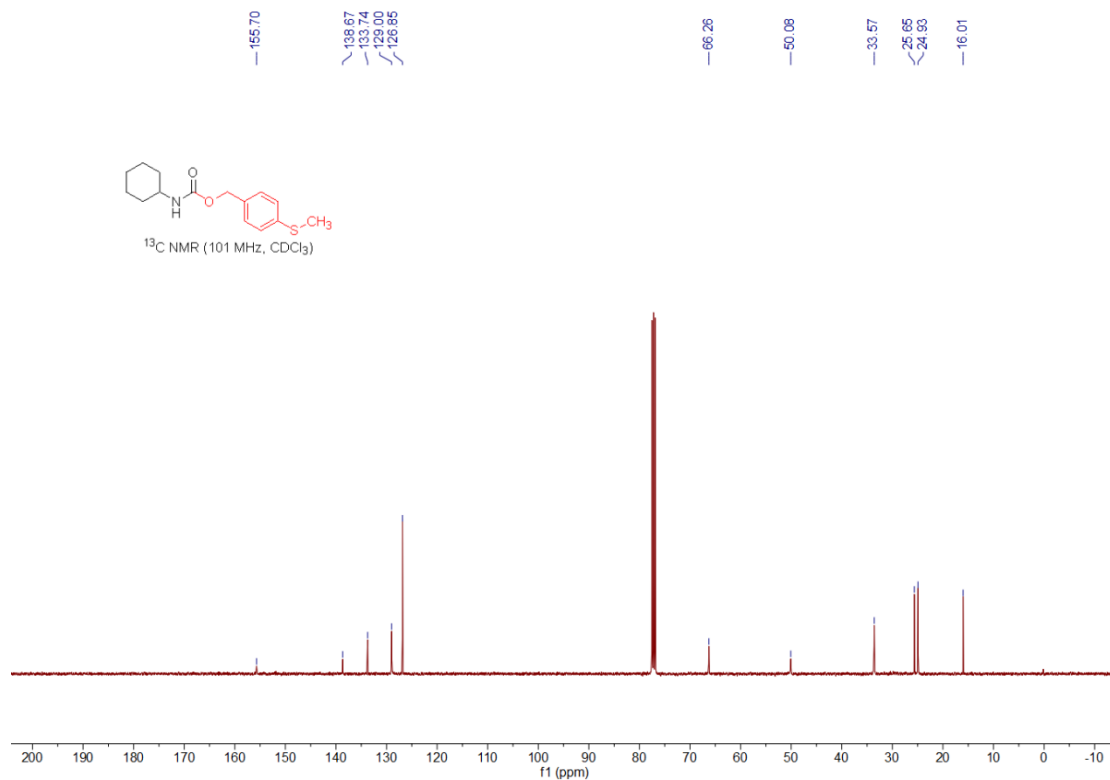

## HRMS spectra of **8y**

Monoisotopic Mass, Even Electron Ions

871 formula(e) evaluated with 1 results within limits (up to 50 best isotopic matches for each mass)

Elements Used:

C: 15-15 H: 21-21 N: 0-100 O: 0-100 Na: 0-1 S: 1-4

25

240403-13-25 17 (0.097)

1: TOF MS ES+  
2.30e+005

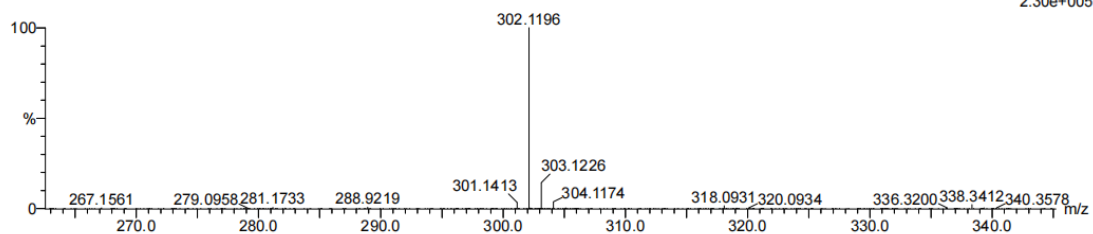

## <sup>1</sup>H NMR spectra of **8z**

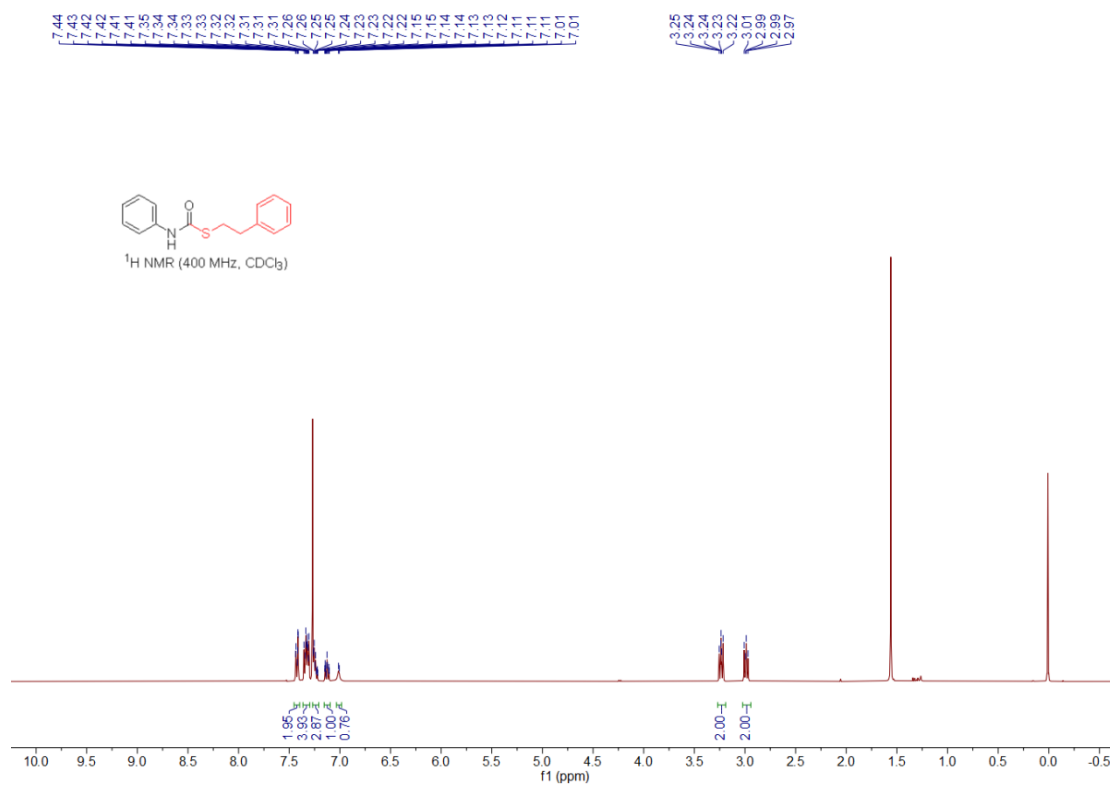

### <sup>1</sup>H NMR spectra of **8aa**

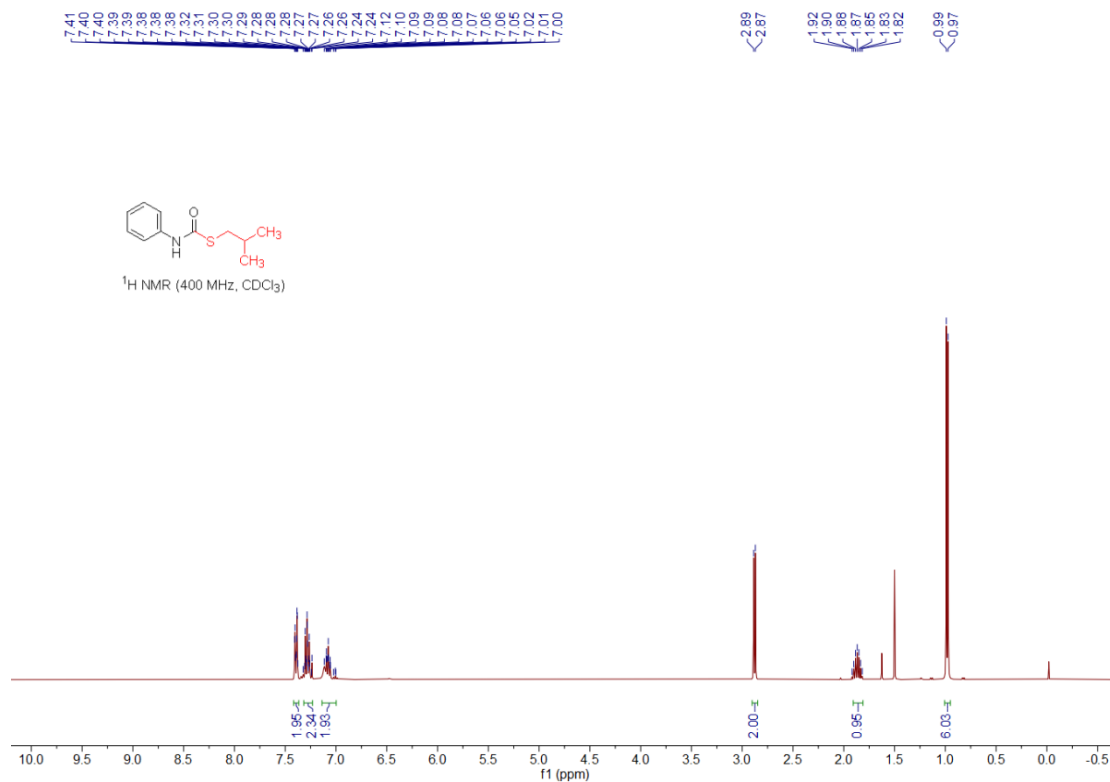

### <sup>13</sup>C NMR spectra of **8aa**

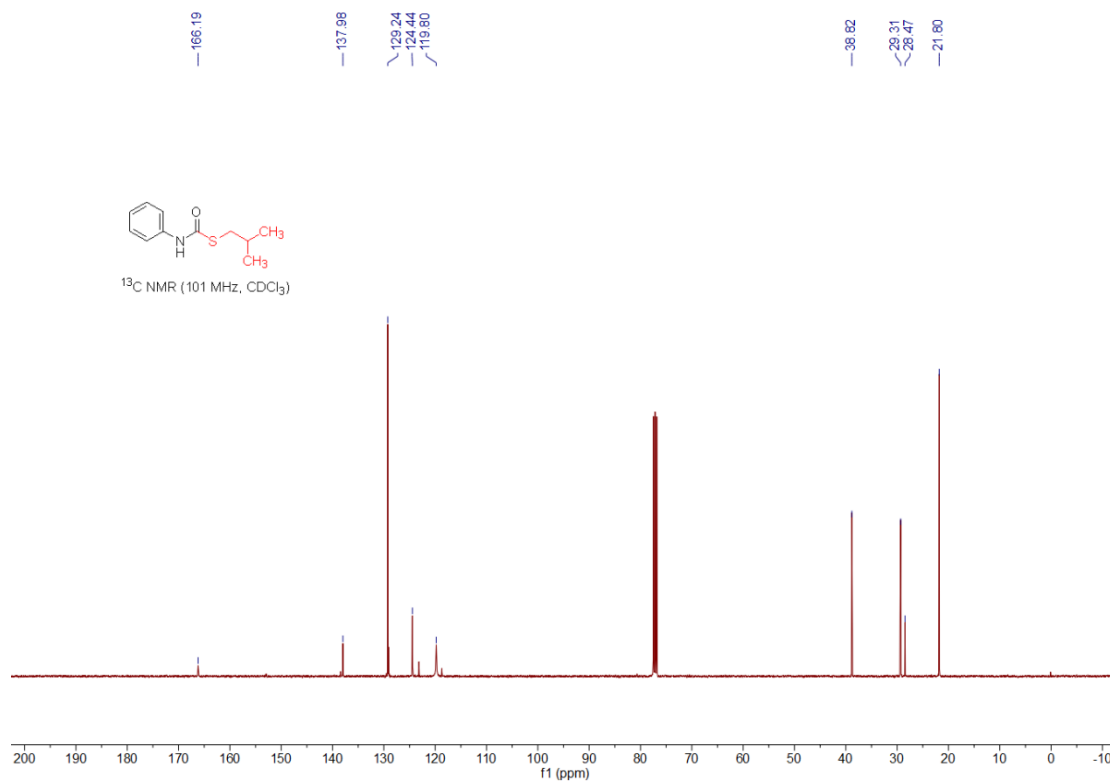

## HRMS spectra of **8aa**

Monoisotopic Mass, Even Electron Ions

427 formula(e) evaluated with 1 results within limits (up to 50 best isotopic matches for each mass)

Elements Used:

C: 11-11 H: 15-15 N: 0-100 O: 0-100 Na: 0-1 S: 1-4

25

240403-13-27 10 (0.072)

1: TOF MS ES+  
1.00e+005

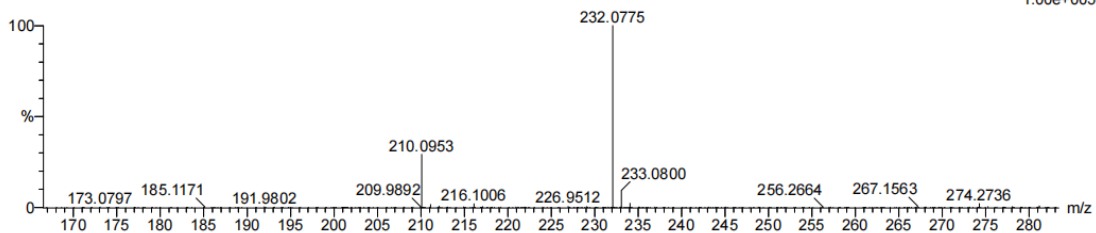

## <sup>1</sup>H NMR spectra of **8ab**

<sup>13</sup>C NMR (101 MHz, CDCl<sub>3</sub>) chemical shifts (ppm): 165.96, 137.96, 129.22, 124.40, 119.80, 44.25, 33.77, 26.17, 25.65.

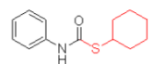

<sup>13</sup>C NMR (101 MHz, CDCl<sub>3</sub>)

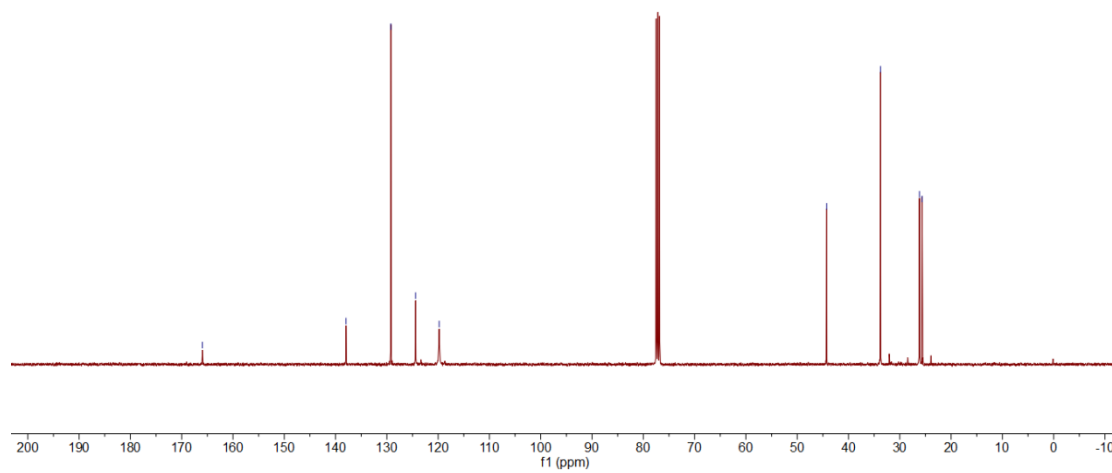

<sup>1</sup>H NMR spectra of **8ac**

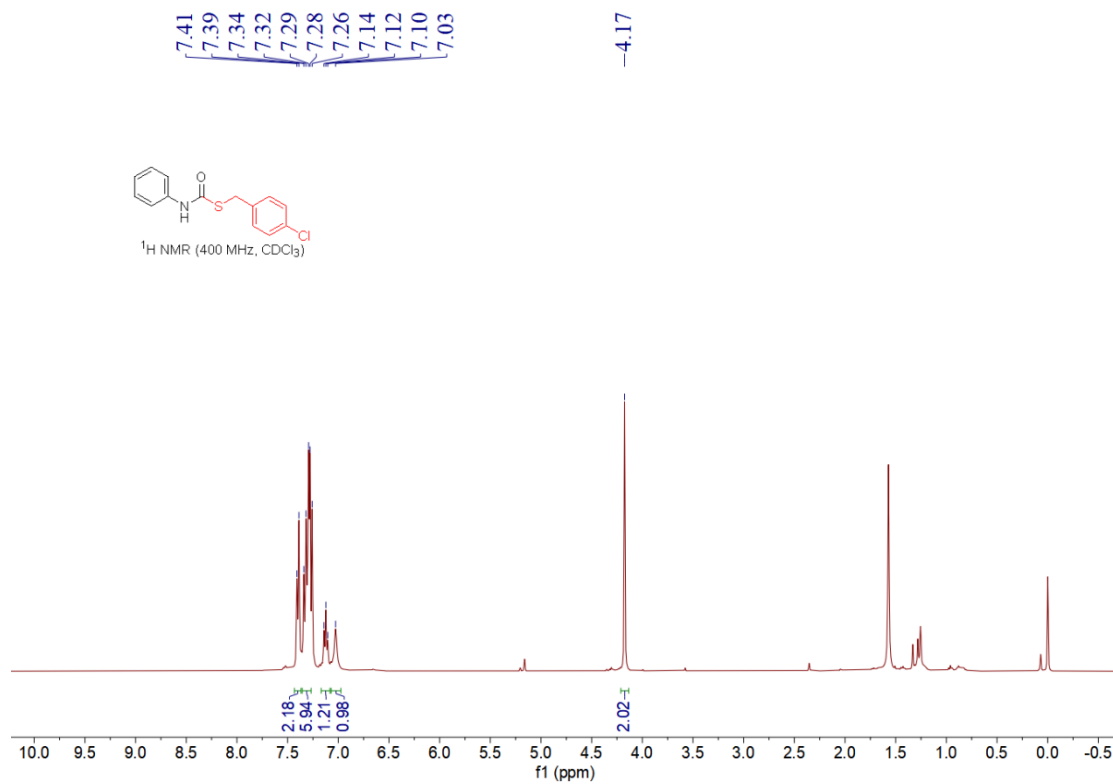

<sup>1</sup>H NMR spectra of **8ad**

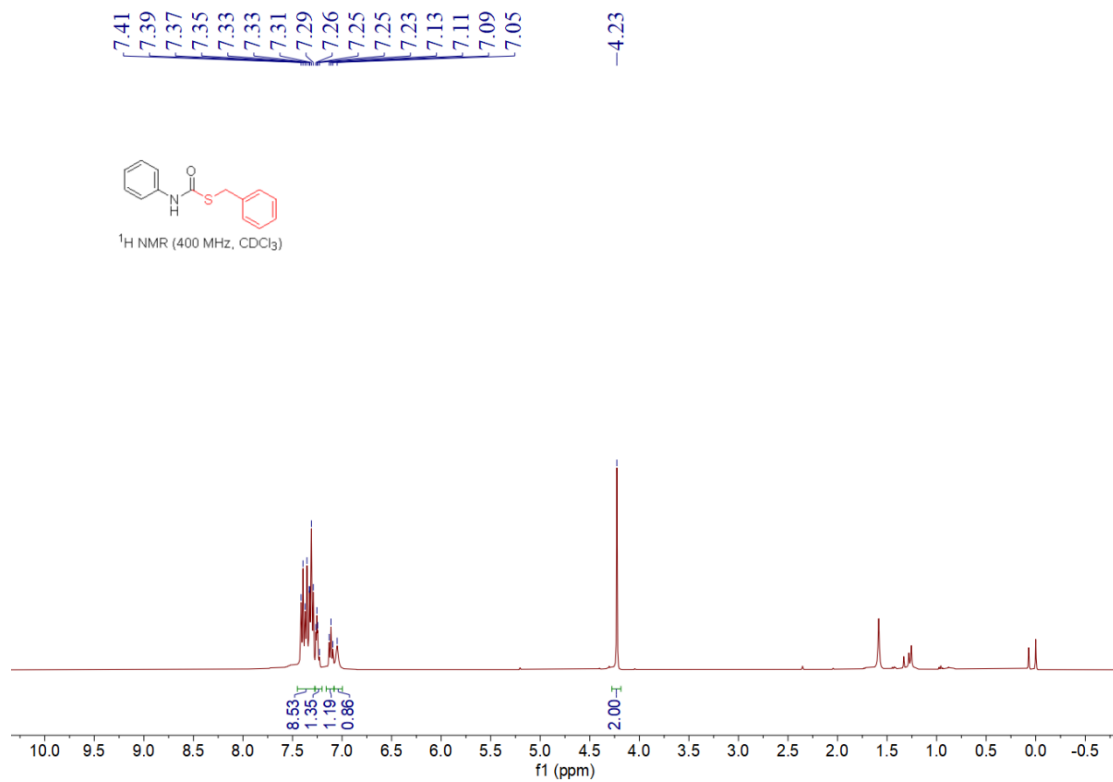



### <sup>1</sup>H NMR spectra of **8ae**

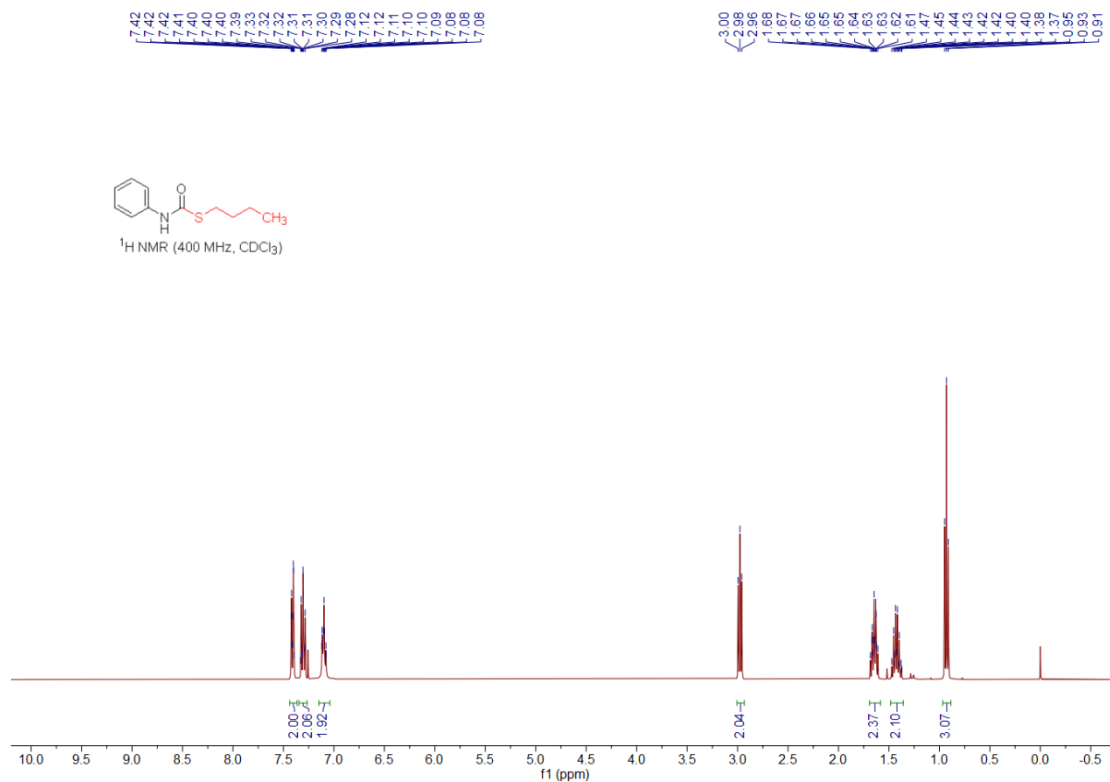

### <sup>1</sup>H NMR spectra of **8af**

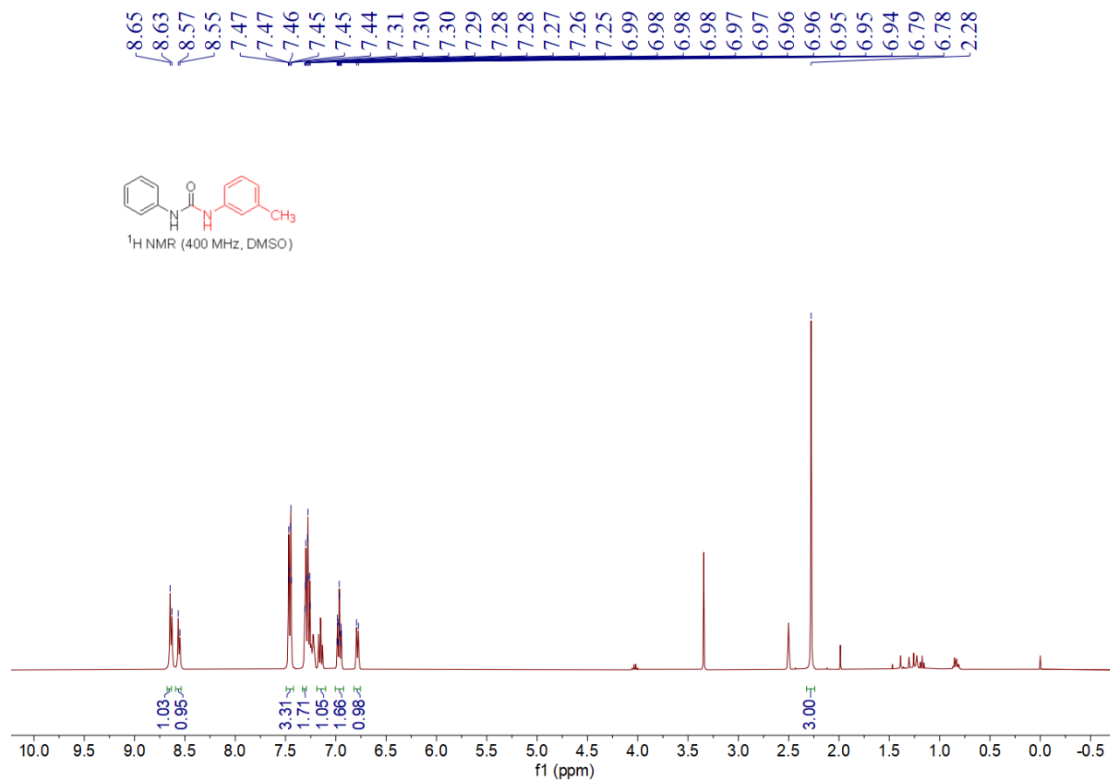

### <sup>1</sup>H NMR spectra of **8ag**

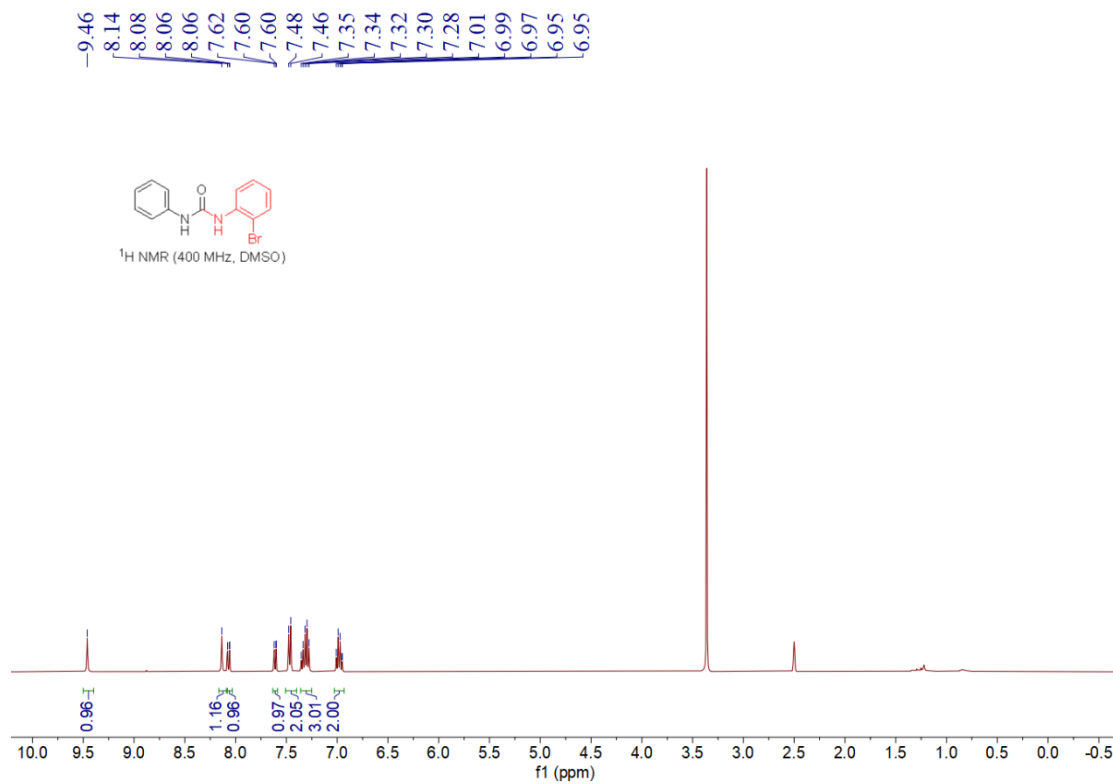

### <sup>1</sup>H NMR spectra of **8ah**

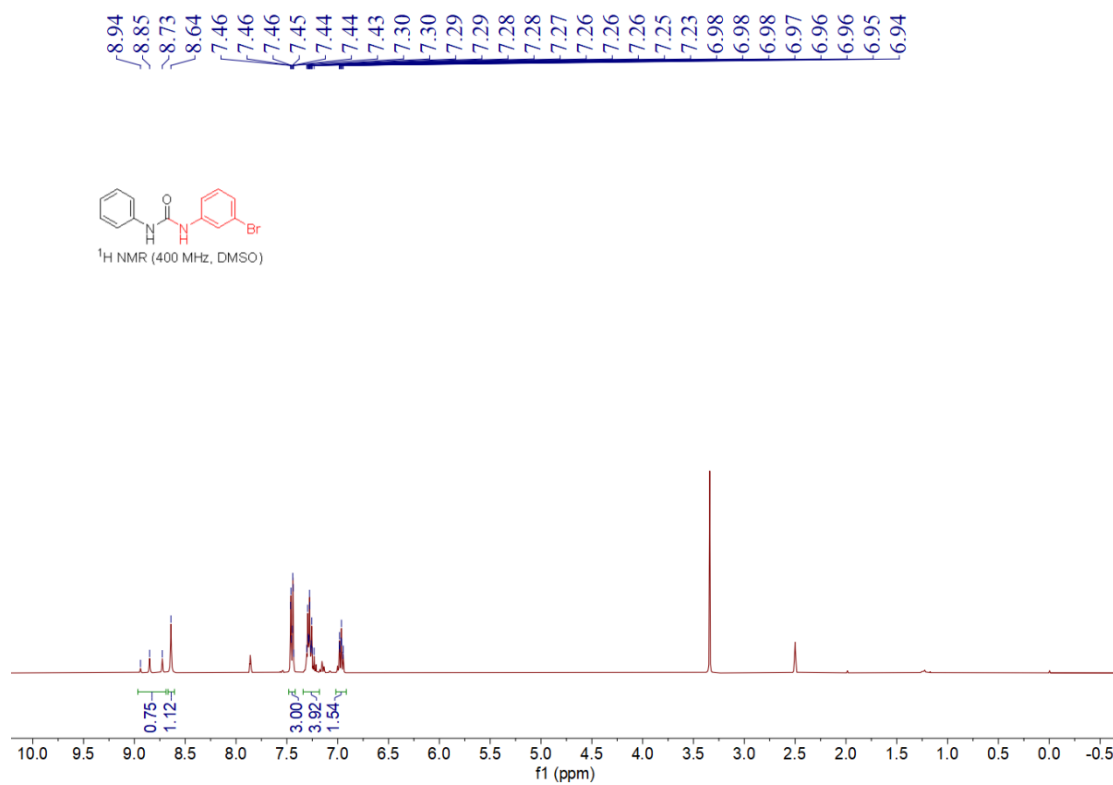

### <sup>1</sup>H NMR spectra of **8ai**

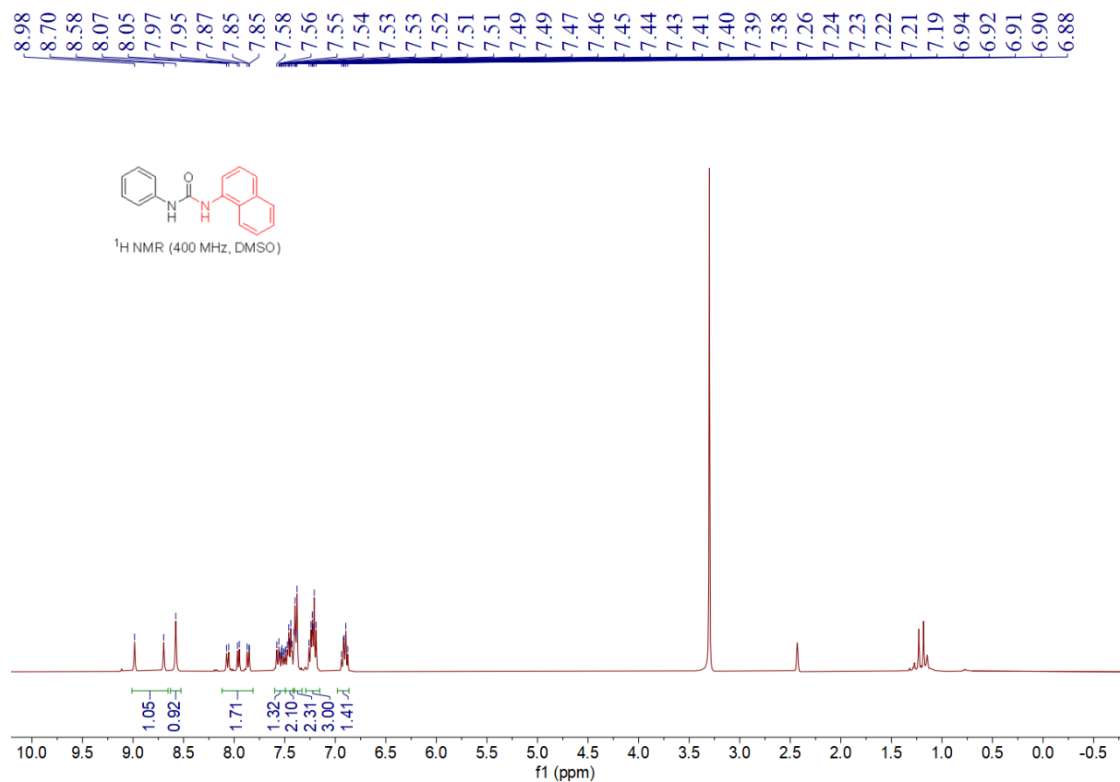

### <sup>1</sup>H NMR spectra of **8aj**

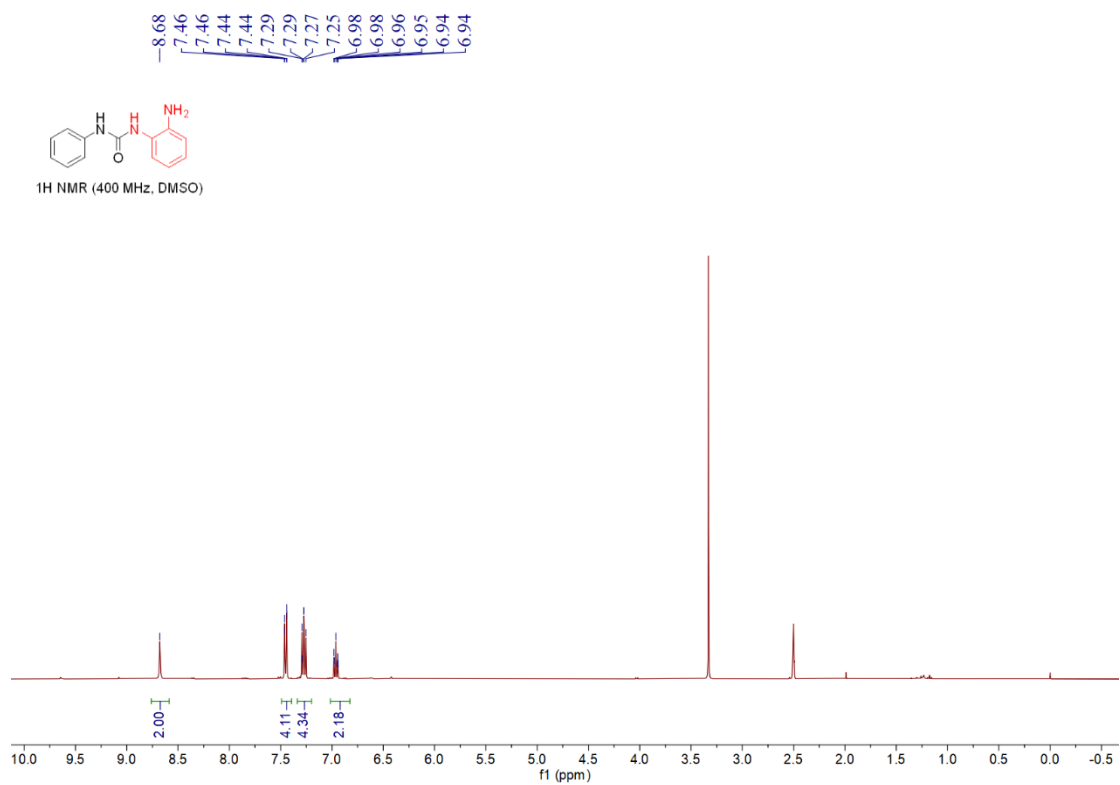

<sup>1</sup>H NMR spectra of **ak**

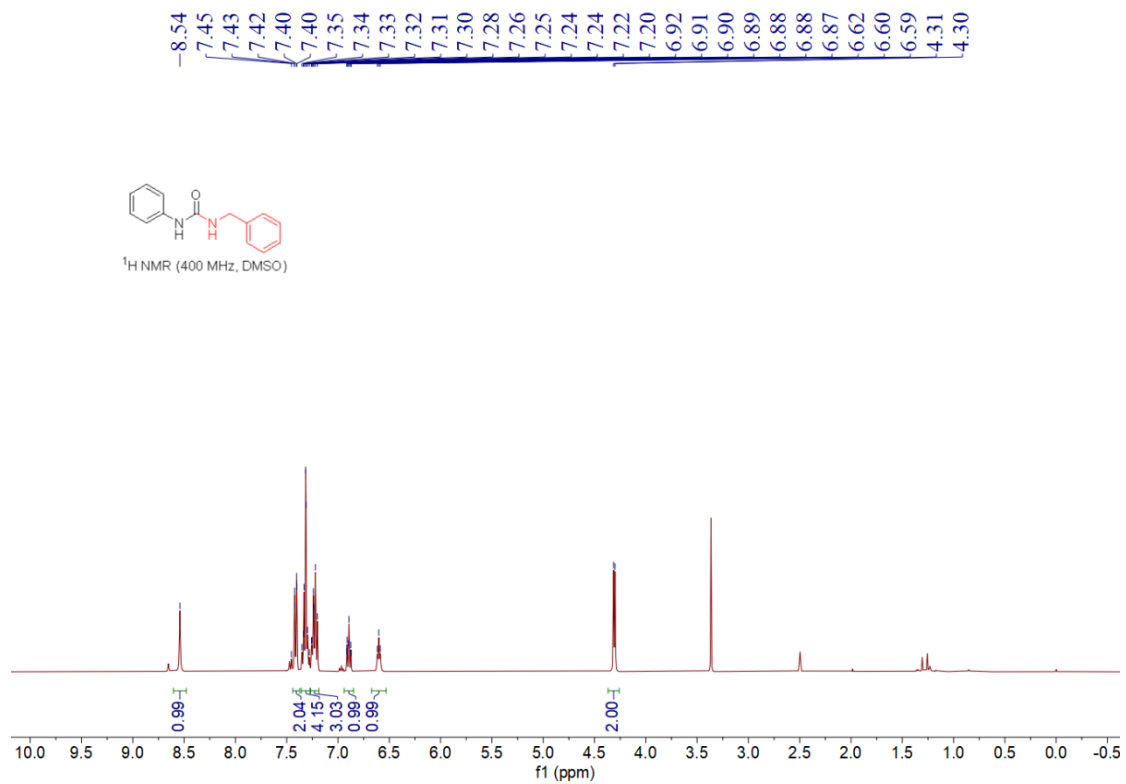

Supplement: d4ra03683b1.pdf [file d4ra03683b1.pdf]
